# Supplementary material
Source: PubMed Central journal article supplement (PMC5733303)
Supplement: ml7b00387_si_001.pdf [file ml7b00387_si_001.pdf]

Supplementary Information for

**Synthesis of novel selenides bearing benzenesulfonamide derivatives as carbonic anhydrase I, II, IV, VII and IX inhibitors**

Andrea Angeli,<sup>a</sup> Damiano Tanini,<sup>b</sup> Antonella Capperucci,<sup>b</sup> Claudiu T. Supuran<sup>a</sup>

<sup>a</sup> Department of University of Florence, NEUROFARBA Dept., Sezione di Scienze Farmaceutiche, Via Ugo Schiff 6, 50019 Sesto Fiorentino (Florence), Italy

<sup>b</sup> Department of University of Florence, Department of Chemistry "Ugo Schiff", Via della Lastruccia 13, I-50019 Sesto Fiorentino, Italy.

**Contents**

|                                                                                                                                               |     |
|-----------------------------------------------------------------------------------------------------------------------------------------------|-----|
| 1. General                                                                                                                                    | S2  |
| 2. Preparation 4-selenocyanatobenzenesulfonamide <b>2</b>                                                                                     | S2  |
| 3. Preparation 4,4'-diselanediyldibenzenesulfonamide <b>3</b>                                                                                 | S3  |
| 4. General Procedure for the preparation of $\beta$ -hydroxy selenide <b>5a-g</b> from diselenide <b>3</b>                                    | S3  |
| 5. General Procedure for the preparation of <i>N</i> -protected $\beta$ -amino selenide <b>7a-c</b>                                           | S6  |
| 6. Preparation of ( <i>S</i> )-4-((2-Amino-3-methylbutyl)selanyl)benzenesulfonamide <b>8</b>                                                  | S8  |
| 7. General procedure for the synthesis of $\beta$ -hydroxyselenides <b>5</b> and $\beta$ -aminoselenides <b>6</b> from selenocyanate <b>2</b> | S9  |
| 8. Carbonic anhydrase inhibition                                                                                                              | S9  |
| 9. NMR spectra of synthesised compounds                                                                                                       | S10 |
| 10. Human Carbonic Anhydrase activity                                                                                                         | S23 |
| 11. References                                                                                                                                | S37 |

## 1. General

All reactions were carried out in an oven-dried glassware under inert atmosphere (N<sub>2</sub>). Ethanol was dried using a solvent purification system (Pure-Solv™). All commercial materials were used as received without further purification. Flash column chromatography purifications were performed with Silica gel 60 (230-400 mesh). Thin layer chromatography was performed with TLC plates Silica gel 60 F<sub>254</sub>. NMR spectra were recorded in CDCl<sub>3</sub> or DMSO-*d*<sub>6</sub> with Varian Gemini 200, Mercury 400, and Bruker 400 Ultrashield spectrometers operating at 200 and 400 MHz (for <sup>1</sup>H), 50 and 100 MHz (for <sup>13</sup>C), and 76 MHz (for <sup>77</sup>Se). NMR signals were referenced to nondeuterated residual solvent signals (7.26 and 2.50 ppm for <sup>1</sup>H, 77.0 and 40.5 ppm for <sup>13</sup>C). (PhSe)<sub>2</sub> was used as an external reference for <sup>77</sup>Se NMR ( $\delta = 461$  ppm). <sup>1</sup>H NMR data are reported as follows: chemical shift, integration, multiplicity (s = singlet, d = doublet, t = triplet, ap d = apparent doublet, m = multiplet, dd = doublet of doublet, bs = broad singlet, bd = broad doublet, ecc.), coupling constant (*J*), and assignment.

## 2. Preparation 4-selenocyanatobenzenesulfonamide **2**

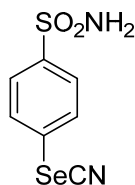

**2**

A suspension of 4-Aminobenzenesulfonamide **1** (1.72 g, 10 mmol) in H<sub>2</sub>O (6 mL) with HCl (11 mL, 32 %) was cooled down to -5°C. Then, an aqueous solution of NaNO<sub>2</sub> (1.2 eq) was added dropwise and the mixture was kept stirring at the same temperature until a persistent pale yellow solution was formed (5–10 min). The resulting diazonium salt, kept at -5°C, was added KSeCN (1.2 eq). The reaction solution was stirred for 2 hours at the same temperature. The product was filtered off, washed with H<sub>2</sub>O, dried under vacuo, and purified by flash column chromatography eluting with 1:1 mixture of hexane/ethyl acetate. (1.79 g, 83%). <sup>1</sup>H NMR (400 MHz, DMSO-*d*<sub>6</sub>)  $\delta$  (ppm): 7.95 (2H, d, *J*=8.6 Hz), 7.89 (2H, d, *J*=8.6 Hz), 7.52 (2H, bs, NH<sub>2</sub>, exchange with D<sub>2</sub>O). <sup>13</sup>C NMR (100 MHz, DMSO-*d*<sub>6</sub>)  $\delta$  (ppm): 145.5, 134.1, 129.8, 127.9, 105.9. <sup>77</sup>Se NMR (76 MHz, DMSO-*d*<sub>6</sub>)  $\delta$  (ppm): 340.0. MS (ESI negative) *m/z* (%): 261 [M-H]<sup>-</sup>; ([M-H]<sup>-</sup> 260.93 required).

### 3. Preparation 4,4'-diselanediyldibenzenesulfonamide **3**

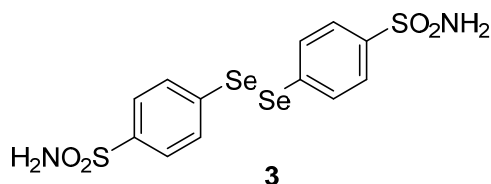

NaBH<sub>4</sub> (3 mmol) was added in small portions with caution to a solution of 4-selenocyanatobenzenesulfonamide **2** (3 mmol) in absolute ethanol (40 mL). The mixture was stirred at room temperature for 2 h. The solvents were removed under vacuum by rotary evaporation and the residue was treated with water. The mixture was extracted with ethyl acetate, dried with anhydrous Na<sub>2</sub>SO<sub>4</sub>, and purified by crystallization from EtOH. (529 mg, 75%). <sup>1</sup>H NMR (400 MHz, DMSO-*d*<sub>6</sub>) δ (ppm): 7.87 (2H, d, *J*=8.3 Hz), 7.79 (2H, d, *J*=8.3 Hz), 7.43 (2H, bs, NH<sub>2</sub>, exchange with D<sub>2</sub>O). <sup>13</sup>C NMR (100 MHz, DMSO-*d*<sub>6</sub>) δ (ppm): 144.3, 135.2, 131.5, 127.5. <sup>77</sup>Se NMR (76 MHz, DMSO-*d*<sub>6</sub>) δ (ppm): 446.7. MS (ESI negative) *m/z* (%): 471 [M-H]<sup>-</sup>; ([M-H]<sup>-</sup> 470.86 required).

### 4. General Procedure for the preparation of β-hydroxy selenide **5a-g** from diselenide **3**

NaBH<sub>4</sub> (23 mg, 0.60 mmol, 3.0 eq.) was portionwise added to a solution of 4,4'-diselanediyldibenzenesulfonamide **3** (94 mg, 0.20 mmol, 1.0 eq.) in EtOH (2 mL) at 0°C under inert atmosphere (N<sub>2</sub>). After 30 min, the epoxide **4** (0.36 mmol, 1.8 eq.) was slowly added and the reaction mixture was stirred at room temperature for 2 h, until complete consumption of the starting material was observed by TLC. The reaction was quenched by addition of saturated aq. NH<sub>4</sub>Cl (2 mL) and diluted with EtOAc (5 mL). The layers were separated and the aqueous layer was extracted with EtOAc (2 x 5 mL), dried over Na<sub>2</sub>SO<sub>4</sub>, filtered and concentrated under vacuum. The crude material was purified by flash chromatography to yield β-hydroxyselenides (**5**) bearing benzenesulfonamide moiety.

#### 4-((3-(Benzyloxy)-2-hydroxypropyl)selanyl)benzenesulfonamide **5a**

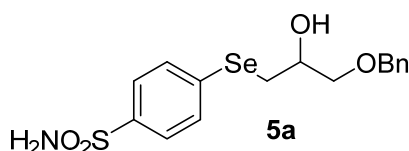

Following the general procedure, 4,4'-diselanediyldibenzenesulfonamide **3** (94 mg, 0.20 mmol) and 2-((benzyloxy)methyl)oxirane **4a** (59 mg, 0.36 mmol) gave after flash chromatography (petroleum ether/EtOAc 1:1) **5a** (128 mg, 89%). <sup>1</sup>H NMR (400 MHz, CDCl<sub>3</sub>) δ (ppm): 2.63 (1H, bs, OH), 3.12 (1H, dd, *J* = 6.8, 12.8 Hz, CH<sub>a</sub>H<sub>b</sub>Se), 3.19 (1H, dd, *J* = 5.6, 12.8 Hz, CH<sub>a</sub>H<sub>b</sub>Se), 3.54 (1H, dd, *J* =

5.9, 9.5 Hz,  $\text{CH}_a\text{H}_b\text{O}$ ), 3.59 (1H, dd,  $J = 4.2, 9.5$  Hz,  $\text{CH}_a\text{H}_b\text{O}$ ), 3.96-4.04 (1H, m,  $\text{CHOH}$ ), 4.53 (2H, ap s,  $\text{CH}_2\text{Ph}$ ), 4.82 (2H, bs,  $\text{NH}_2$ ), 7.29-7.40 (5H, m), 7.59 (2H, d,  $J = 8.5$  Hz), 7.76 (2H, d,  $J = 8.5$  Hz).  $^{13}\text{C}$  NMR (100 MHz,  $\text{CDCl}_3$ )  $\delta$  (ppm): 31.1 ( $\text{CH}_2\text{Se}$ ), 69.5, 72.8, 73.5, 126.9, 127.8, 128.0, 128.5, 131.3, 137.5, 137.7, 139.9. **MS** (ESI positive)  $m/z$  (%): 401  $[\text{M}+\text{H}]^+$ , (100). Elemental analysis:  $\text{C}_{16}\text{H}_{19}\text{NO}_4\text{SSe}$  Calcd. C 48.00%, H 4.78%, N 3.50%. Found: C 48.11%, H 4.74%, N 3.46%.

#### 4-((2-Hydroxy-3-isopropoxypropyl)selanyl)benzenesulfonamide **5b**

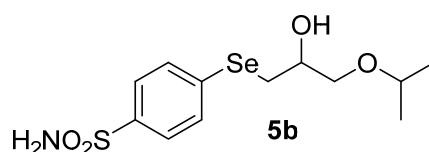

Following the general procedure, 4,4'-diselanediyldibenzenesulfonamide **3** (94 mg, 0.20 mmol) and 2-(isopropoxymethyl)oxirane **4b** (42 mg, 0.36 mmol) gave after flash chromatography (petroleum ether/EtOAc 1:1) **5b** (121 mg, 96%).  $^1\text{H}$  NMR (400 MHz,  $\text{CDCl}_3$ )  $\delta$  (ppm): 1.15 (6H, d,  $J = 6.1$  Hz), 2.78 (1H, bs, OH), 3.11 (1H, dd,  $J = 6.7, 12.7$  Hz,  $\text{CH}_a\text{H}_b\text{Se}$ ), 3.16 (1H, dd,  $J = 5.8, 12.7$  Hz,  $\text{CH}_a\text{H}_b\text{Se}$ ), 3.45 (1H, dd,  $J = 6.0, 9.4$  Hz,  $\text{CH}_a\text{H}_b\text{O}$ ), 3.53 (1H, dd,  $J = 4.1, 9.4$  Hz,  $\text{CH}_a\text{H}_b\text{O}$ ), 3.59 (1H, ept,  $J = 6.1$  Hz,  $\text{CH}(\text{CH}_3)_2$ ), 3.89-3.98 (1H, m,  $\text{CHOH}$ ), 5.09 (2H, bs,  $\text{NH}_2$ ), 7.58 (2H, d,  $J = 8.5$  Hz), 7.75 (2H, d,  $J = 8.5$  Hz).  $^{13}\text{C}$  NMR (100 MHz,  $\text{CDCl}_3$ )  $\delta$  (ppm): 21.9, 22.0, 30.9 ( $\text{CH}_2\text{Se}$ ), 69.6, 70.7, 72.4, 126.8, 131.2, 137.9, 139.9. **MS** (ESI positive)  $m/z$  (%): 375.8  $[\text{M}+\text{Na}]^+$ , (100) ( $[\text{M}+\text{Na}]^+$  375.31 required). Elemental analysis:  $\text{C}_{12}\text{H}_{19}\text{NO}_4\text{SSe}$  Calcd. C 40.91%, H 5.44%, N 3.98%. Found: C 40.82%, H 5.49%, N 3.94%.

#### 4-((3-(Allyloxy)-2-hydroxypropyl)selanyl)benzenesulfonamide **5c**

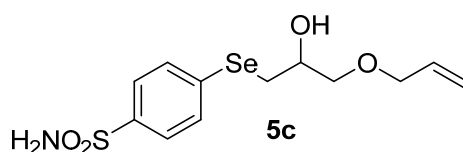

Following the general procedure, 4,4'-diselanediyldibenzenesulfonamide **3** (71 mg, 0.15 mmol) and 2-((allyloxy)methyl)oxirane **4c** (31 mg, 0.27 mmol) gave after flash chromatography (petroleum ether/EtOAc 7:3) **5c** (70 mg, 74%).  $^1\text{H}$  NMR (400 MHz,  $\text{CDCl}_3$ )  $\delta$  (ppm) 2.71 (1H, bs, OH), 3.12 (1H, dd,  $J = 6.8, 12.8$  Hz,  $\text{CH}_a\text{H}_b\text{Se}$ ), 3.18 (1H, dd,  $J = 5.7, 12.8$  Hz,  $\text{CH}_a\text{H}_b\text{Se}$ ), 3.49 (1H, dd,  $J = 6.0, 9.5$  Hz,  $\text{CH}_a\text{H}_b\text{O}$ ), 3.55 (1H, dd,  $J = 4.0, 9.5$  Hz,  $\text{CH}_a\text{H}_b\text{O}$ ), 3.94-4.06 (3H, m,  $\text{CH}_2\text{CH}=\text{CH}_2$  overlapped with  $\text{CHOH}$ ), 5.04 (2H, bs,  $\text{NH}_2$ ), 5.19-5.32 (2H, m), 5.83-5.93 (1H, m), 7.59 (2H, d,  $J = 8.2$  Hz), 7.77 (2H, d,  $J = 8.2$  Hz).  $^{13}\text{C}$  NMR (100 MHz,  $\text{CDCl}_3$ )  $\delta$  (ppm): 31.0 ( $\text{CH}_2\text{Se}$ ), 69.5, 72.3, 72.7, 117.6, 126.9, 131.2, 134.1, 137.7, 140.0. **MS** (ESI positive)  $m/z$  (%): 373  $[\text{M}+\text{Na}]^+$ , (100).

Elemental analysis: C<sub>12</sub>H<sub>17</sub>NO<sub>4</sub>SSe Calcd. C 41.15%, H 4.89%, N 4.00%. Found: C 41.07%, H 4.94%, N 4.05%.

#### 4-((2-Hydroxyhexyl)selanyl)benzenesulfonamide **5d**

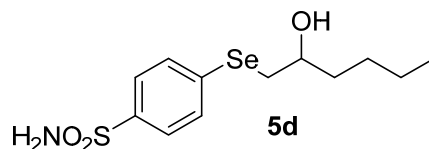

Following the general procedure, 4,4'-diselanediyldibenzenesulfonamide **3** (94 mg, 0.20 mmol) and 2-butyloxirane **4d** (36 mg, 0.36 mmol) gave after flash chromatography (petroleum ether/EtOAc 1:1) **5d** (82 mg, 68%). <sup>1</sup>H NMR (400 MHz, CDCl<sub>3</sub>) δ (ppm) 0.92 (3H, t, *J* = 7.1 Hz), 1.29-1.49 (4H, m), 1.54-1.63 (2H, m), 1.97. (1H, bs, OH), 3.03 (1H, dd, *J* = 8.2, 12.8 Hz, CH<sub>a</sub>H<sub>b</sub>Se), 3.23 (1H, dd, *J* = 3.7, 12.8 Hz, CH<sub>a</sub>H<sub>b</sub>Se), 3.76-3.82 (1H, m, CHOH), 5.07 (2H, bs, NH<sub>2</sub>), 7.61 (2H, d, *J* = 8.5 Hz), 7.78 (2H, d, *J* = 8.5 Hz). <sup>13</sup>C NMR (100 MHz, CDCl<sub>3</sub>) δ (ppm): 14.0, 22.6, 27.9, 36.2, 36.6, 70.3, 126.9, 131.5, 137.6, 140.0. MS (ESI positive) *m/z* (%): 337 [M+H]<sup>+</sup>, (100). Elemental analysis: C<sub>12</sub>H<sub>19</sub>NO<sub>3</sub>SSe Calcd. C 42.86%, H 5.69%, N 4.16%. Found: C 42.73%, H 5.76%, N 4.21%.

#### 4-((3-Bromo-2-hydroxypropyl)selanyl)benzenesulfonamide **5e**

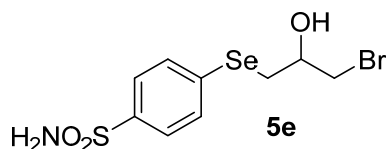

Following the general procedure, 4,4'-diselanediyldibenzenesulfonamide **3** (141 mg, 0.30 mmol) and 2-(bromomethyl)oxirane **4e** (74 mg, 0.54 mmol) gave after flash chromatography (petroleum ether/EtOAc 3:2) **5e** (189 mg, 94%). <sup>1</sup>H NMR (400 MHz, DMSO-*d*<sub>6</sub>) δ (ppm) 3.15 (1H, dd, *J* = 7.1, 12.4 Hz, CH<sub>a</sub>H<sub>b</sub>Se), 3.24 (1H, dd, *J* = 5.1, 12.4 Hz, CH<sub>a</sub>H<sub>b</sub>Se), 3.54 (1H, dd, *J* = 5.6, 10.2 Hz, CH<sub>a</sub>H<sub>b</sub>O), 3.61 (1H, dd, *J* = 4.7, 10.2 Hz, CH<sub>a</sub>H<sub>b</sub>O), 3.85-3.92 (1H, m, CHOH), 5.68 (1H, d, *J* = 5.3 Hz, OH), 7.34 (2H, bs, NH<sub>2</sub>), 7.65 (2H, d, *J* = 8.6 Hz), 7.69 (2H, d, *J* = 8.6 Hz). <sup>13</sup>C NMR (100 MHz, DMSO-*d*<sub>6</sub>) δ (ppm): 32.8, 39.8, 70.2, 127.1, 131.3, 137.1, 142.8. MS (ESI negative) *m/z* (%): 372 [M-H]<sup>-</sup>, (100). Elemental analysis: C<sub>9</sub>H<sub>12</sub>BrNO<sub>3</sub>SSe Calcd. C 28.97%, H 3.24%, N 3.75%. Found: C 29.02%, H 3.19%, N 3.69%.

#### 4-((2-Hydroxycyclohexyl)selanyl)benzenesulfonamide **5f**

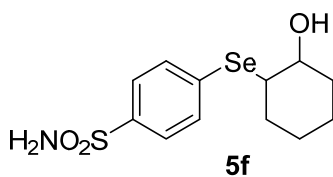

Following the general procedure, 4,4'-diselanediyldibenzenesulfonamide **3** (71 mg, 0.15 mmol) and 7-oxabicyclo[4.1.0]heptane **4f** (26 mg, 0.27 mmol) gave after flash chromatography (petroleum ether/EtOAc 1:1) **5f** (37 mg, 41%).  $^1\text{H NMR}$  (400 MHz,  $\text{CDCl}_3$ )  $\delta$  (ppm) 1.25-1.37 (4H, m), 1.63-1.72 (1H, m), 1.74-1.83 (1H, m), 2.12-2.26 (2H, m), 2.62 (1H, bs, OH), 3.05-3.12 (1H, m, CHSe), 3.40-3.48 (1H, m, CHO), 4.91 (2H, bs,  $\text{NH}_2$ ), 7.70 (2H, d,  $J = 8.4$  Hz), 7.80 (2H, d,  $J = 8.4$  Hz).  $^{13}\text{C NMR}$  (100 MHz,  $\text{CDCl}_3$ )  $\delta$  (ppm): 24.4, 26.8, 33.5, 34.4, 53.9, 73.1, 126.6, 134.6, 138.2, 141.0. **MS** (ESI positive)  $m/z$  (%): 357  $[\text{M}+\text{Na}]^+$ , (100). Elemental analysis:  $\text{C}_{12}\text{H}_{17}\text{NO}_3\text{SSe}$  Calcd. C 43.12%, H 5.13%, N 4.19%. Found: C 43.05%, H 5.19%, N 4.23%.

#### 4-(((5R)-2-Hydroxy-2-methyl-5-(prop-1-en-2-yl)cyclohexyl)selanyl)benzenesulfonamide **5g**

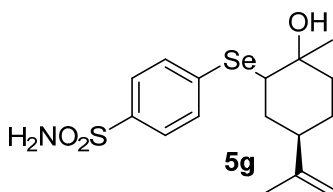

Following the general procedure, 4,4'-diselanediyldibenzenesulfonamide **3** (71 mg, 0.15 mmol) and (4R)-1-methyl-4-(prop-1-en-2-yl)-7-oxabicyclo[4.1.0]heptane **4g** (41 mg, 0.27 mmol) gave after flash chromatography (petroleum ether/EtOAc 2:1) **5g** (51 mg, 56%).  $^1\text{H NMR}$  (400 MHz,  $\text{CDCl}_3$ )  $\delta$  (ppm) 1.39 (3H, s), 1.63-1.66 (1H, m), 1.63-1.84 (1H, OH partially overlapped), 1.69 (3H, s), 1.72-1.90 (4H, m), 2.23-2.35 (2H, m), 3.54-3.59 (1H, m, CHSe), 4.72 (2H, ap d,  $J = 14.7$  Hz), 5.14 (2H, bs,  $\text{NH}_2$ ), 7.64 (2H, d,  $J = 8.3$  Hz), 7.77 (2H, d,  $J = 8.3$  Hz).  $^{13}\text{C NMR}$  (100 MHz,  $\text{CDCl}_3$ )  $\delta$  (ppm): 21.3, 26.1, 29.6, 33.8, 35.4, 39.9, 54.1, 72.5, 109.5, 126.8, 132.8, 138.1, 140.2, 148.4. **MS** (ESI positive)  $m/z$  (%): 411  $[\text{M}+\text{Na}]^+$ , (100). Elemental analysis:  $\text{C}_{16}\text{H}_{23}\text{NO}_3\text{SSe}$  Calcd. C 49.48%, H 5.97%, N 3.61%. Found: C 49.36%, H 6.04%, N 3.65%.

#### 5. General Procedure for the preparation of *N*-protected $\beta$ -amino selenide **7a-c**

$\text{NaBH}_4$  (23 mg, 0.60 mmol, 3.0 eq.) was portionwise added to a solution of 4,4'-diselanediyldibenzenesulfonamide **3** (94 mg, 0.20 mmol, 1.0 eq.) in EtOH (2 mL) at  $0^\circ\text{C}$  under inert atmosphere ( $\text{N}_2$ ). After 30 min, a solution of aziridine **6** (0.36 mmol, 1.8 eq.) in THF (1 mL) was slowly added and the reaction mixture was stirred at room temperature for 12 h. The reaction was quenched by addition of saturated aq.  $\text{NH}_4\text{Cl}$  (2 mL) and diluted with EtOAc (5 mL), The layers

were separated and the aqueous layer was extracted with EtOAc (2 x 5 mL), dried over Na<sub>2</sub>SO<sub>4</sub>, filtered and concentrated under vacuum. The crude material was purified by flash chromatography to yield *N*-protected β-aminoselenides **7-ac** bearing benzenesulfonamide moiety.

**(S)-4-Methyl-N-(3-methyl-1-((4-sulfamoylphenyl)selanyl)butan-2-yl)benzenesulfonamide 7a**

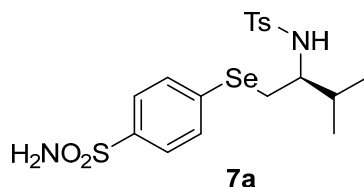

Following the general procedure, 4,4'-diselanediyldibenzenesulfonamide **3** (71 mg, 0.15 mmol) and (*S*)-2-isopropyl-1-tosylaziridine **6a** (65 mg, 0.27 mmol) gave after flash chromatography (petroleum ether/EtOAc 3:2) **7a** (94 mg, 73%). <sup>1</sup>H NMR (400 MHz, DMSO-*d*<sub>6</sub>) δ (ppm) 0.71 (6H, d, *J* = 6.8 Hz), 1.81-1.93 (1H, m), 2.36 (3H, s), 2.81 (1H, dd, *J* = 6.1, 12.2 Hz, CH<sub>a</sub>H<sub>b</sub>Se), 3.03 (1H, dd, *J* = 6.9, 12.2 Hz, CH<sub>a</sub>H<sub>b</sub>Se), 3.07-3.15 (1H, m, CHNH), 7.31 (2H, d, *J* = 8.0 Hz), 7.36 (2H, bs, NH<sub>2</sub>), 7.39 (2H, d, *J* = 8.4 Hz), 7.61 (2H, d, *J* = 8.0 Hz), 7.64 (2H, d, *J* = 8.4 Hz), 7.71 (1H, bd, *J* = 7.8 Hz, NH). <sup>13</sup>C NMR (100 MHz, DMSO-*d*<sub>6</sub>) δ (ppm): 12.8, 19.6, 21.9, 31.3, 31.6, 58.9, 127.1, 127.5, 130.3, 131.5, 136.4, 139.6, 143.0, 143.3. <sup>77</sup>Se NMR (76 MHz, DMSO-*d*<sub>6</sub>) δ (ppm): 268.8. MS (ESI positive) *m/z* (%): 476 [M+H]<sup>+</sup>, (100). Elemental analysis: C<sub>18</sub>H<sub>24</sub>N<sub>2</sub>O<sub>4</sub>S<sub>2</sub>Se Calcd. C 45.47%, H 5.09%, N 5.89%. Found: C 45.34%, H 5.15%, N 5.93%.

**(S)-4-methyl-N-(1-phenyl-3-((4-sulfamoylphenyl)selanyl)propan-2-yl)benzenesulfonamide 7b**

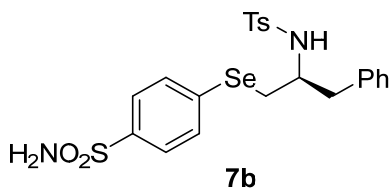

Following the general procedure, 4,4'-diselanediyldibenzenesulfonamide **3** (36 mg, 0.1 mmol) and (*S*)-2-benzyl-1-tosylaziridine **6b** (52 mg, 0.18 mmol) gave after flash chromatography (petroleum ether/EtOAc 3:2) **7b** (65 mg, 69%). <sup>1</sup>H NMR (400 MHz, DMSO-*d*<sub>6</sub>) δ (ppm) 2.33 (3H, s), 2.66 (1H, dd, *J* = 6.9, 13.5 Hz, CH<sub>a</sub>H<sub>b</sub>Ph), 2.82 (1H, dd, *J* = 6.4, 13.5 Hz, CH<sub>a</sub>H<sub>b</sub>Ph), 2.96 (1H, dd, *J* = 5.1, 11.6 Hz, CH<sub>a</sub>H<sub>b</sub>Se), 3.01 (1H, dd, *J* = 4.9, 11.6 Hz, CH<sub>a</sub>H<sub>b</sub>Se), 3.35-3.42 (1H, m, CHNH), 7.00-7.06 (2H, m), 7.15-7.22 (5H, m), 7.31 (2H, d, *J* = 8.4 Hz), 7.37 (2H, bs, NH<sub>2</sub>), 7.44 (2H, d, *J* = 8.2 Hz), 7.60 (2H, d, *J* = 8.4 Hz), 7.97 (1H, bd, *J* = 5.8 Hz, NH). <sup>13</sup>C NMR (100 MHz, DMSO-*d*<sub>6</sub>) δ (ppm): 21.9, 32.1 (CH<sub>2</sub>Se), 40.9 (CH<sub>2</sub>Ph, partially overlapped with DMSO-*d*<sub>6</sub> signal), 55.9 (CHNH), 127.0, 127.1, 127.2, 129.1, 130.1, 130.3, 131.0, 136.4, 138.4, 138.8, 142.8, 143.3. MS

(ESI positive)  $m/z$  (%): 547  $[M+Na]^+$ , (100). Elemental analysis:  $C_{22}H_{24}N_2O_4S_2Se$  Calcd. C 50.47%, H 4.62%, N 5.35%. Found: C 50.35%, H 4.68%, N 5.38%.

***tert*-Butyl (*S*)-(3-methyl-1-((4-sulfamoylphenyl)selanyl)butan-2-yl)carbamate **7c****

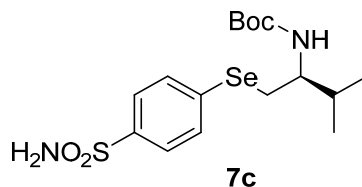

Following the general procedure, 4,4'-diselanediyldibenzenesulfonamide **3** (94 mg, 0.20 mmol) and *tert*-butyl (*S*)-2-isopropylaziridine-1-carboxylate **6c** (67 mg, 0.36 mmol) gave after flash chromatography (petroleum ether/EtOAc 3:1) **7c** (108 mg, 71%).  $^1H$  NMR (400 MHz,  $CDCl_3$ )  $\delta$  (ppm) 0.91 (3H, d,  $J = 6.9$  Hz), 0.94 (3H, d,  $J = 6.8$  Hz), 1.42 (9H, s), 1.83-1.93 (1H, m), 3.13 (2H, ap d,  $J = 5.9$  Hz,  $CH_2Se$ ), 3.62-3.74 (1H, m,  $CHNH$ ), 4.57 (1H, bd,  $J = 9.0$  Hz,  $CHNH$ ), 5.08 (2H, bs,  $NH_2$ ), 7.58 (2H, d,  $J = 8.3$  Hz), 7.76 (2H, d,  $J = 8.3$  Hz).  $^{13}C$  NMR (100 MHz,  $CDCl_3$ )  $\delta$  (ppm): 17.7, 19.6, 28.4, 31.6, 55.3, 79.5, 126.8, 131.5, 138.0, 140.0, 155.6.  $^{77}Se$  NMR (76 MHz,  $CDCl_3$ )  $\delta$  (ppm): 265.6. MS (ESI positive)  $m/z$  (%): 422  $[M+H]^+$ , (100). Elemental analysis:  $C_{16}H_{26}N_2O_4SSe$  Calcd. C 45.60%, H 6.22%, N 6.65%. Found: C 45.71%, H 6.18%, N 6.60%.

**6. Preparation of (*S*)-4-((2-Amino-3-methylbutyl)selanyl)benzenesulfonamide **8****

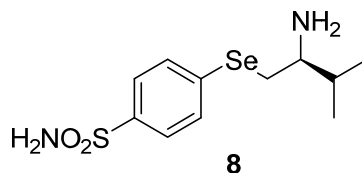

Following a reported procedure,<sup>1</sup> a solution of acetyl chloride (107  $\mu$ L, 1.5 mmol, 15 eq.) in MeOH (1 mL) was slowly added to a solution of *tert*-butyl (*S*)-(3-methyl-1-((4-sulfamoylphenyl)selanyl)butan-2-yl)carbamate **7c** (42 mg, 0.1 mmol, 1.0 eq.) in MeOH (1 mL) at 0  $^{\circ}C$  under inert atmosphere ( $N_2$ ). The reaction mixture was stirred at 0  $^{\circ}C$  for 6 h and the solvent was removed under vacuum to afford the crude product. Flash column chromatography (petroleum ether/ethyl acetate 1:2) gave (*S*)-4-((2-amino-3-methylbutyl)selanyl)benzenesulfonamide **8** (17 mg, 52%).  $^1H$  NMR (400 MHz,  $DMSO-d_6$ )  $\delta$  (ppm) 0.92 (6H, ap t,  $J = 6.3$  Hz), 1.97-2.1 (1H, m), 3.01-3.13 (1H, m), 3.23 (1H, dd,  $J = 6.9, 13.1$  Hz), 3.27-3.38 (1H, m), 7.38 (2H, bs), 7.67-7.74 (4H, m), (8.20 (2H, bs).  $^{13}C$  NMR (100 MHz,  $DMSO-d_6$ )  $\delta$  (ppm): 18.2, 18.9, 27.6, 30.6, 56.5, 127.2, 132.0, 135.4, 143.4. MS (ESI positive)  $m/z$  (%): 320  $[M-H]^-$ , (100). Elemental analysis:  $C_{11}H_{18}N_2O_2SSe$  Calcd. C 41.12%, H 5.65%, N 8.72%. Found: C 41.22%, H 5.59%, N 8.67%.



## 7. General procedure for the synthesis of $\beta$ -hydroxyselenides **5** and $\beta$ -aminoselenides **6** from selenocyanate **2**

NaBH<sub>4</sub> (30 mg, 0.80 mmol, 4.0 eq.) was portionwise added to a solution of 4-selenocyanatobenzenesulfonamide **2** (52 mg, 0.20 mmol, 1.0 eq.) in EtOH (2 mL) at room temperature under inert atmosphere (N<sub>2</sub>). After 1 h, the epoxide **4** or the aziridine **6** (0.18 mmol, 0.9 eq.) was slowly added and the reaction mixture was stirred at room temperature for 3 h, until complete consumption of the starting material was observed by TLC. The reaction was quenched by addition of saturated aq. NH<sub>4</sub>Cl (2 mL) and diluted with EtOAc (5 mL). The layers were separated and the aqueous layer was extracted with EtOAc (2 x 5 mL), dried over Na<sub>2</sub>SO<sub>4</sub>, filtered and concentrated under vacuum. The crude material was purified by flash chromatography to yield selenides **5** and **6**, bearing benzenesulfonamide moiety.

## 8. Carbonic anhydrase inhibition

An Applied Photophysics stopped-flow instrument has been used for assaying the CA catalyzed CO<sub>2</sub> hydration activity.<sup>2</sup> Phenol red (at a concentration of 0.2 mM) has been used as indicator, working at the absorbance maximum of 557 nm, with 20 mM Hepes (pH 7.5) as buffer, and 20 mM Na<sub>2</sub>SO<sub>4</sub> (for maintaining constant the ionic strength), following the initial rates of the CA-catalyzed CO<sub>2</sub> hydration reaction for a period of 10–100 s. The CO<sub>2</sub> concentrations ranged from 1.7 to 17 mM for the determination of the kinetic parameters and inhibition constants. For each inhibitor at least six traces of the initial 5–10% of the reaction have been used for determining the initial velocity. The uncatalyzed rates were determined in the same manner and subtracted from the total observed rates. Stock solutions of inhibitor (0.1 mM) were prepared in distilled-deionized water and dilutions up to 0.01 nM were done thereafter with the assay buffer. Inhibitor and enzyme solutions were preincubated together for 15 min at room temperature prior to assay, in order to allow for the formation of the E-I complex. The inhibition constants were obtained by non-linear least-squares methods using PRISM 3 and the Cheng–Prusoff equation, as reported earlier,<sup>1-6</sup> and represent the mean from at least three different determinations. All CA isoforms were recombinant ones obtained in-house as reported earlier.<sup>2-7</sup>

## 9. NMR Spectra

### $^1\text{H}$ and $^{13}\text{C}$ NMR Spectra of compound **2**

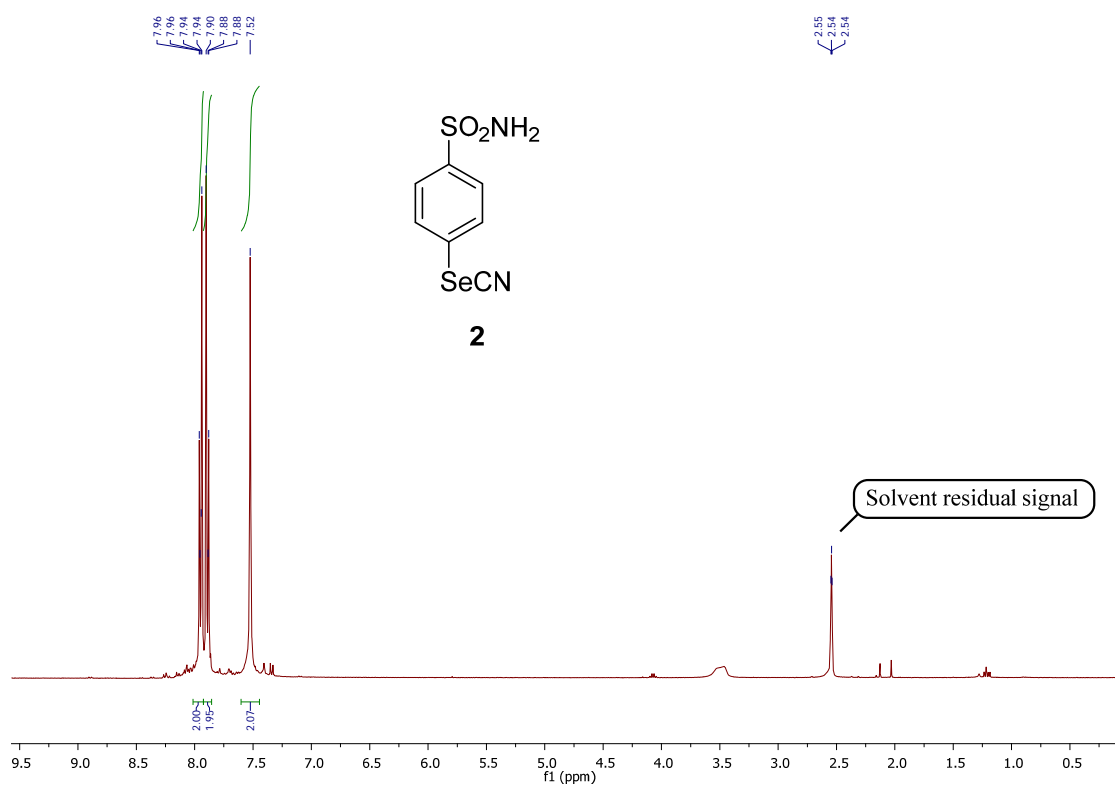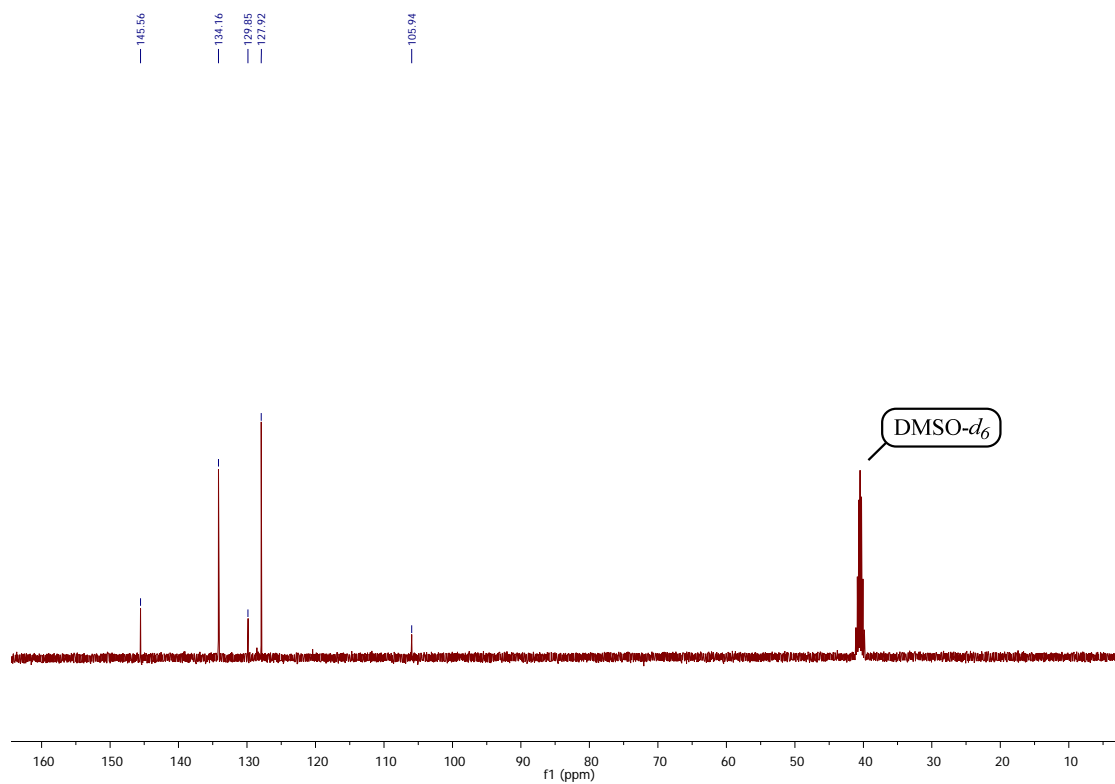

### $^{77}\text{Se}$ NMR Spectra of compound 2

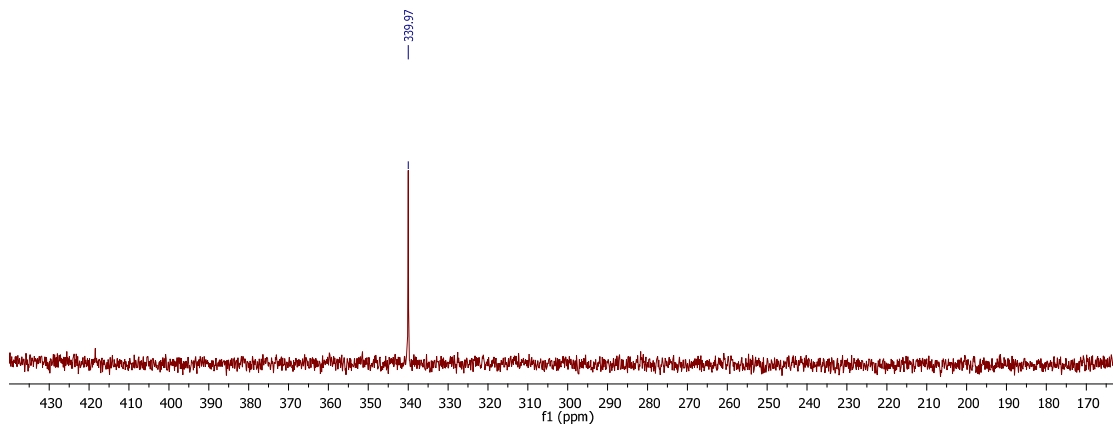

### $^1\text{H}$ and $^{13}\text{C}$ NMR Spectra of compound 3

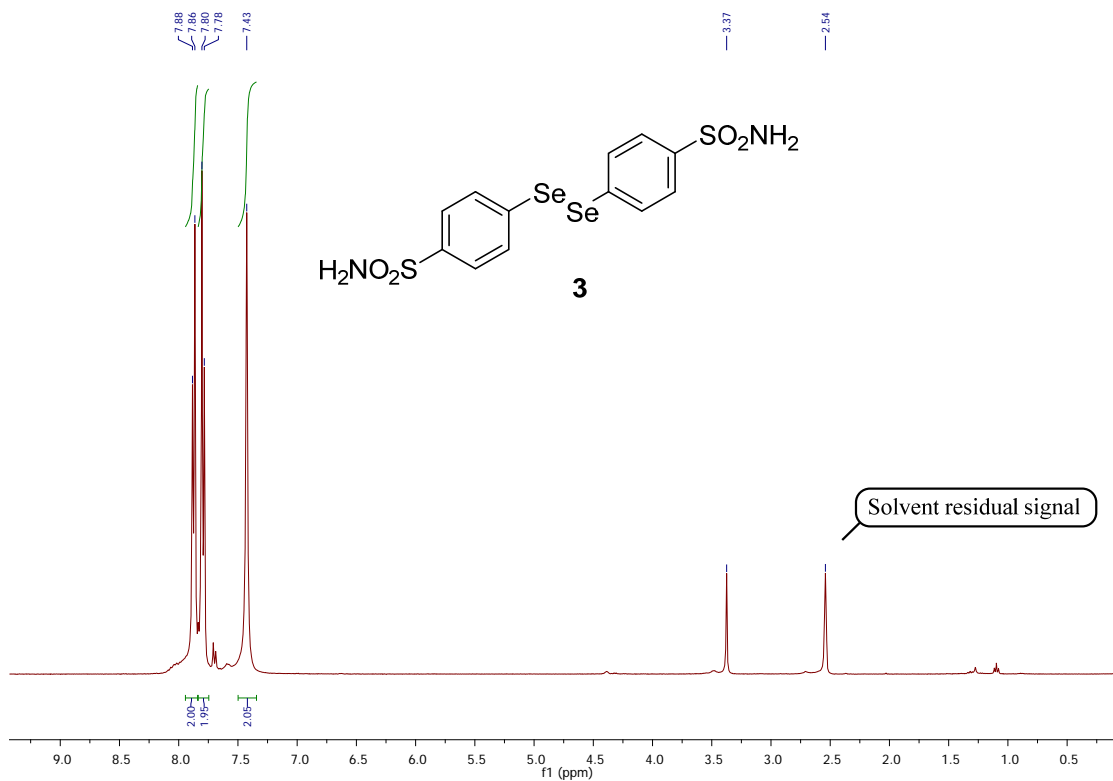

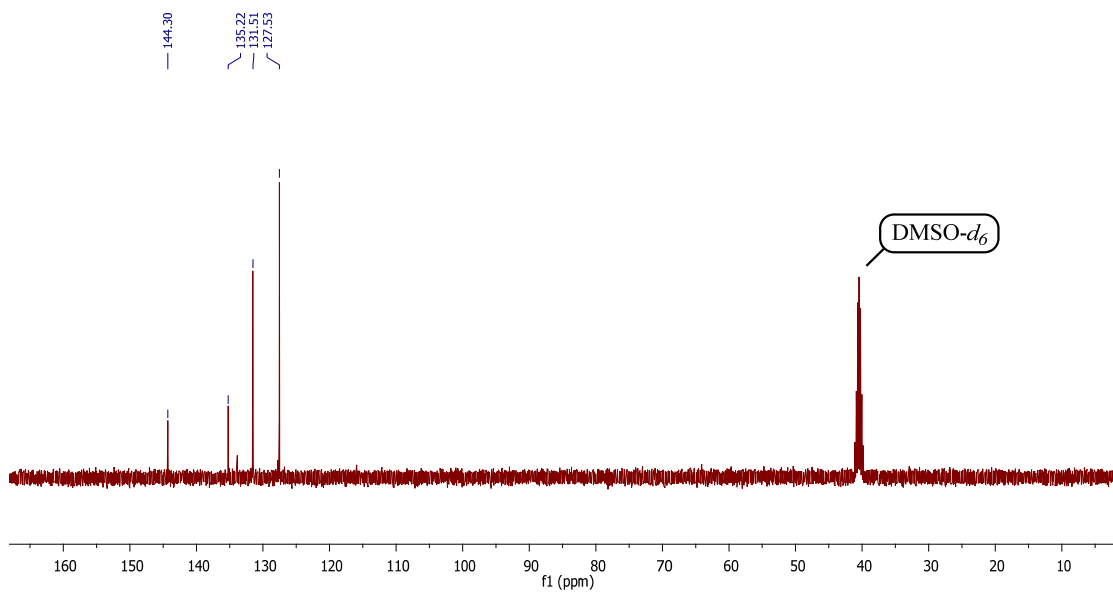

### <sup>77</sup>Se NMR Spectra of compound 3

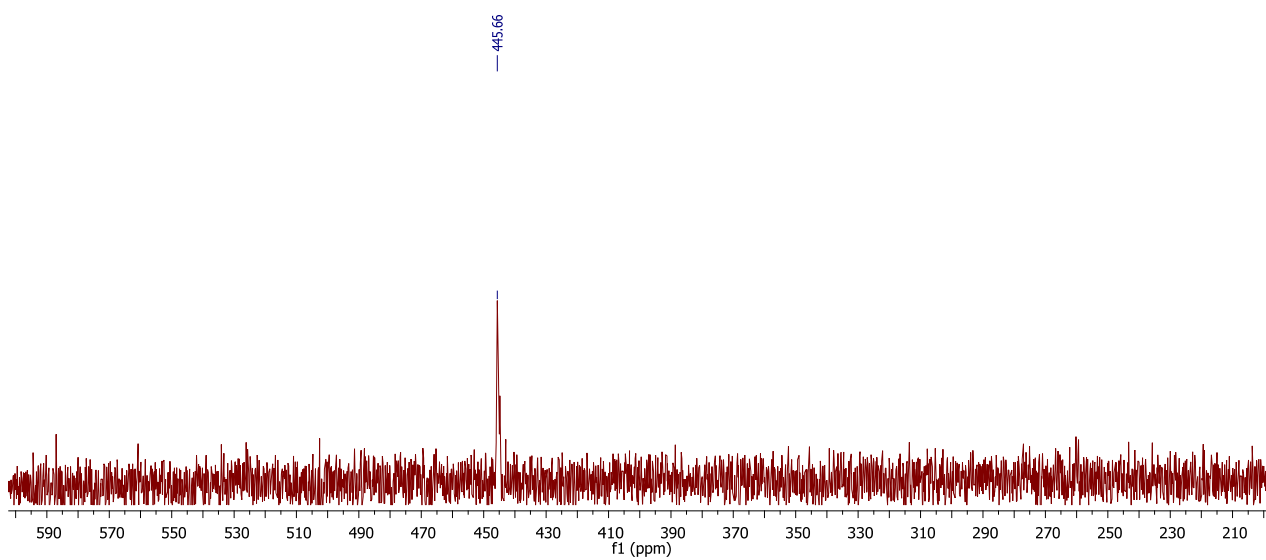

# $^1\text{H}$ and $^{13}\text{C}$ NMR Spectra of compound **5a**

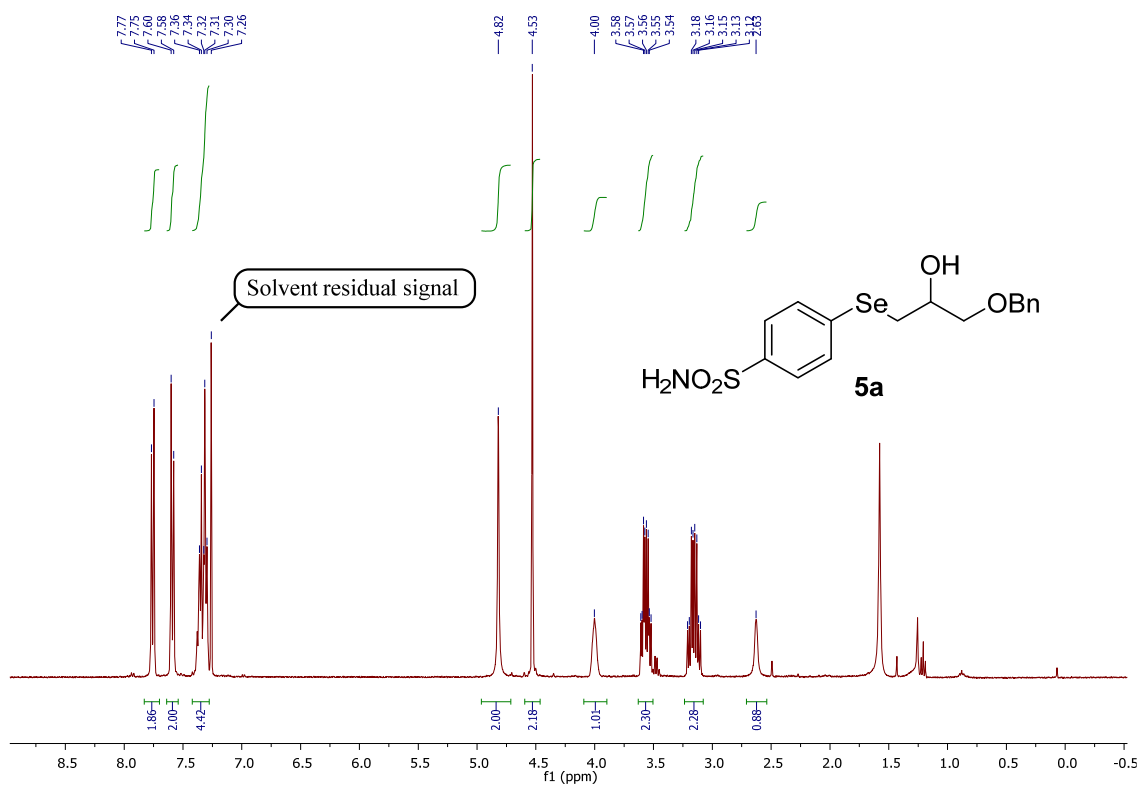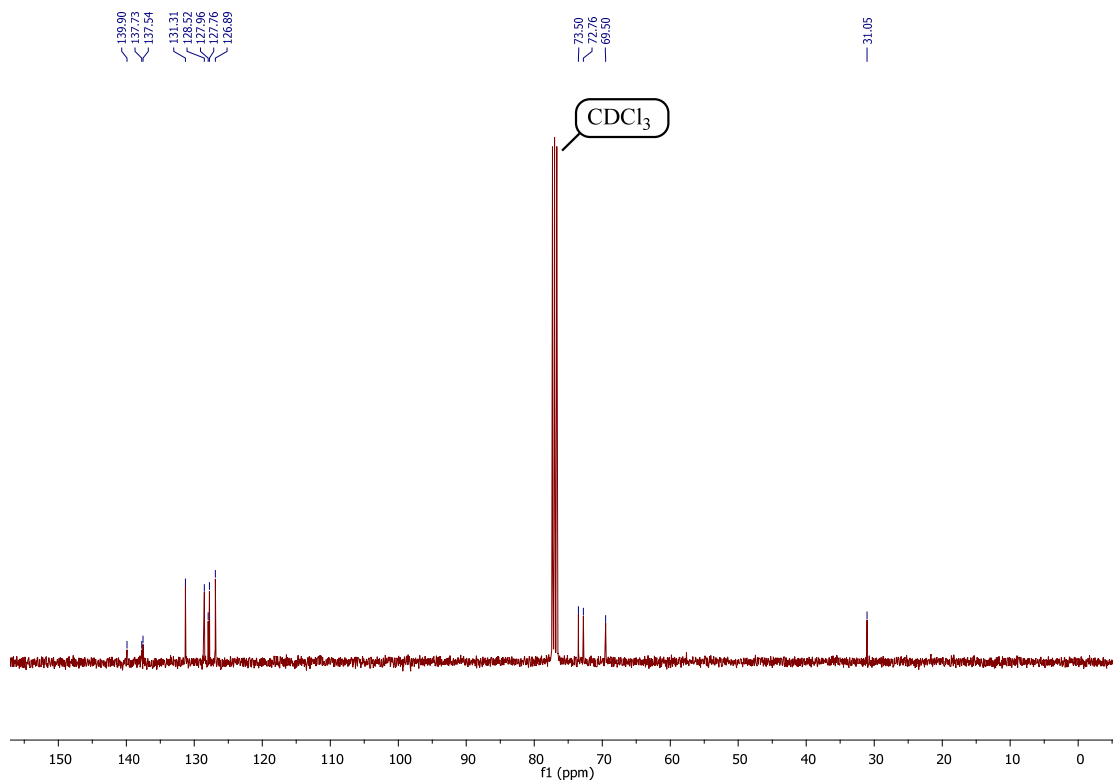

# $^1\text{H}$ and $^{13}\text{C}$ NMR Spectra of compound **5b**

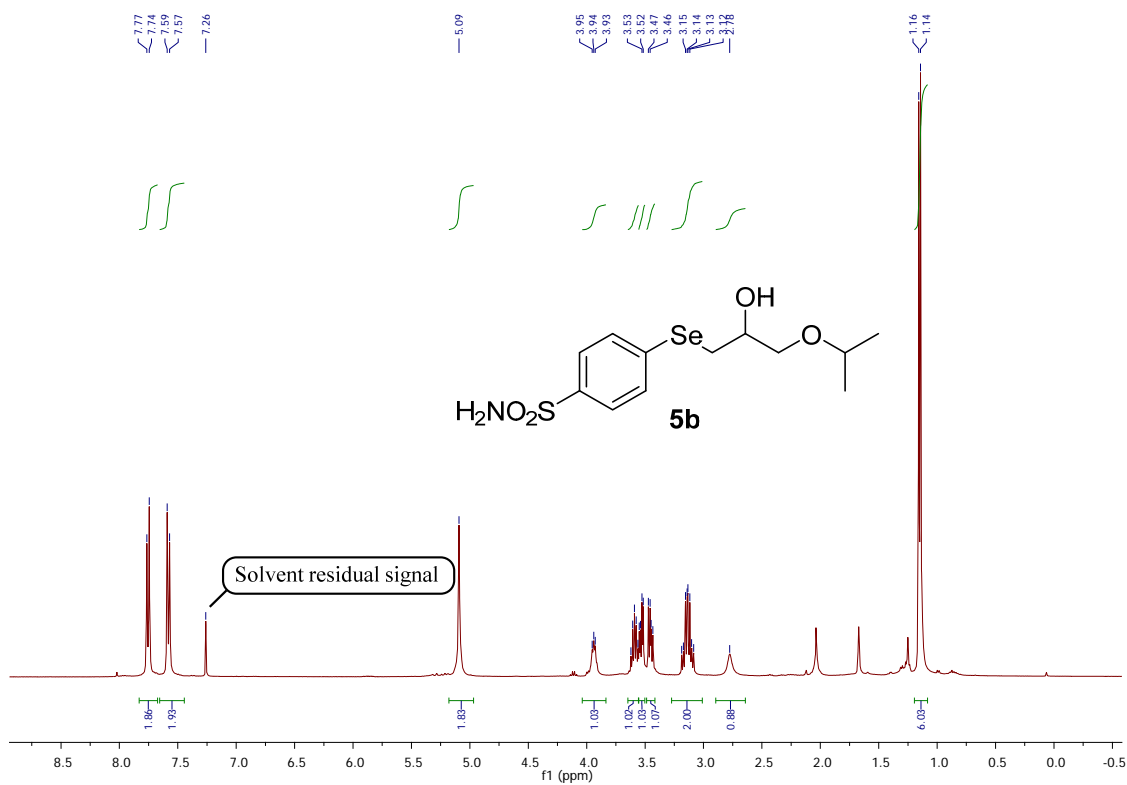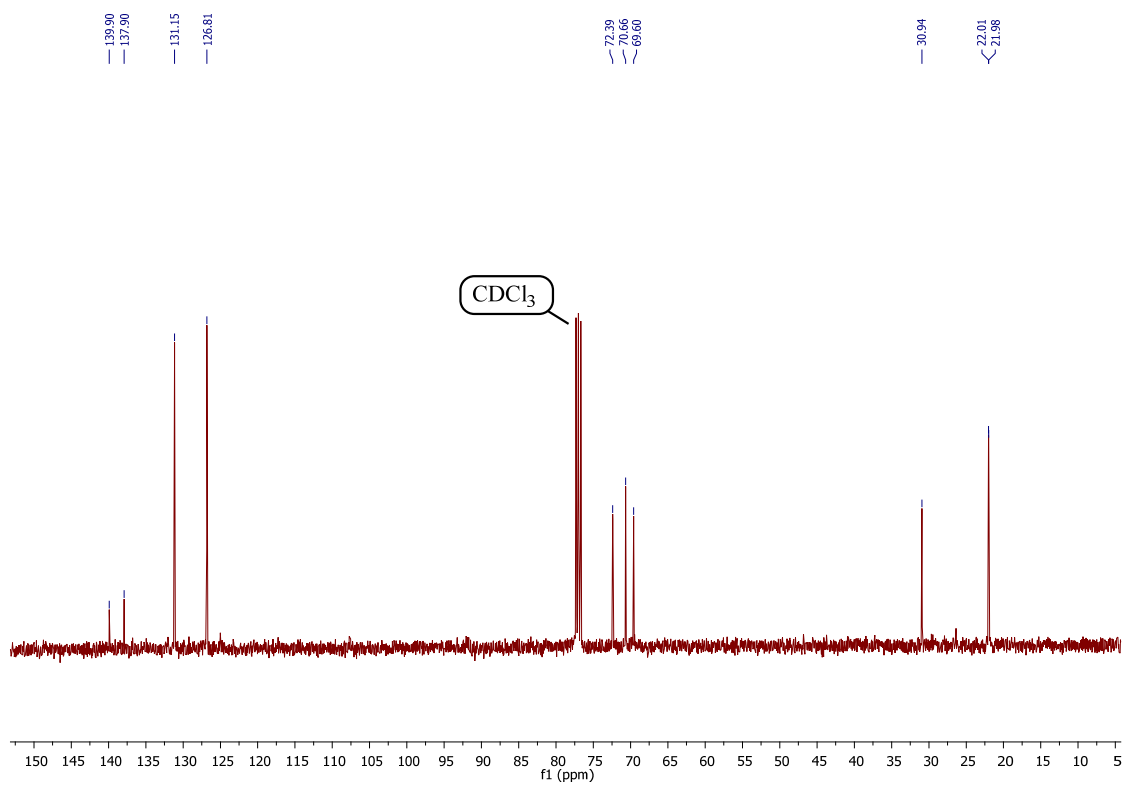

# $^1\text{H}$ and $^{13}\text{C}$ NMR Spectra of compound **5c**

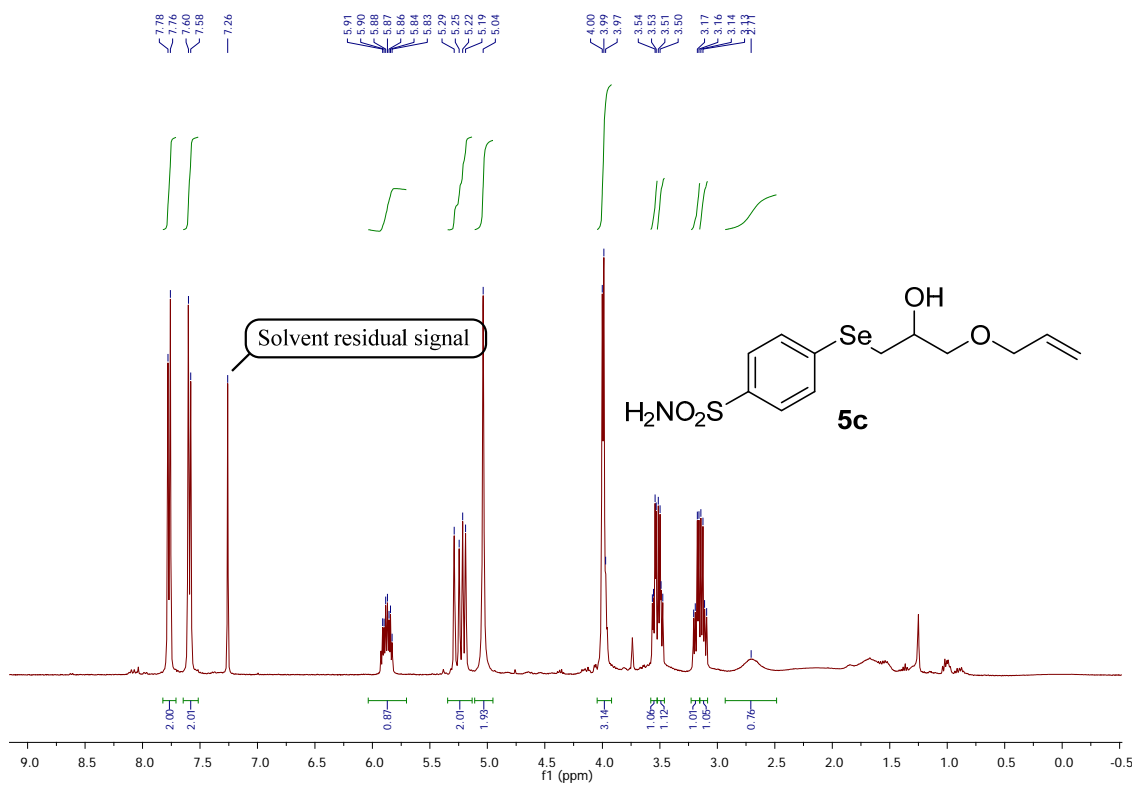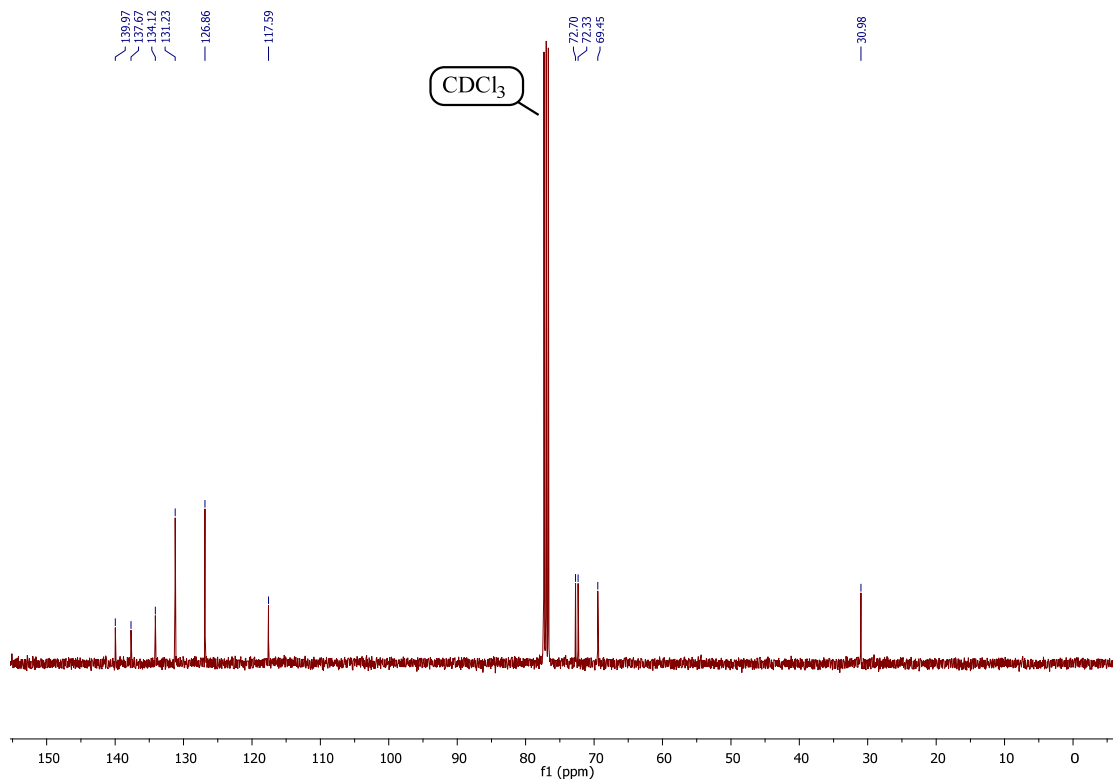

# $^1\text{H}$ and $^{13}\text{C}$ NMR Spectra of compound **5d**

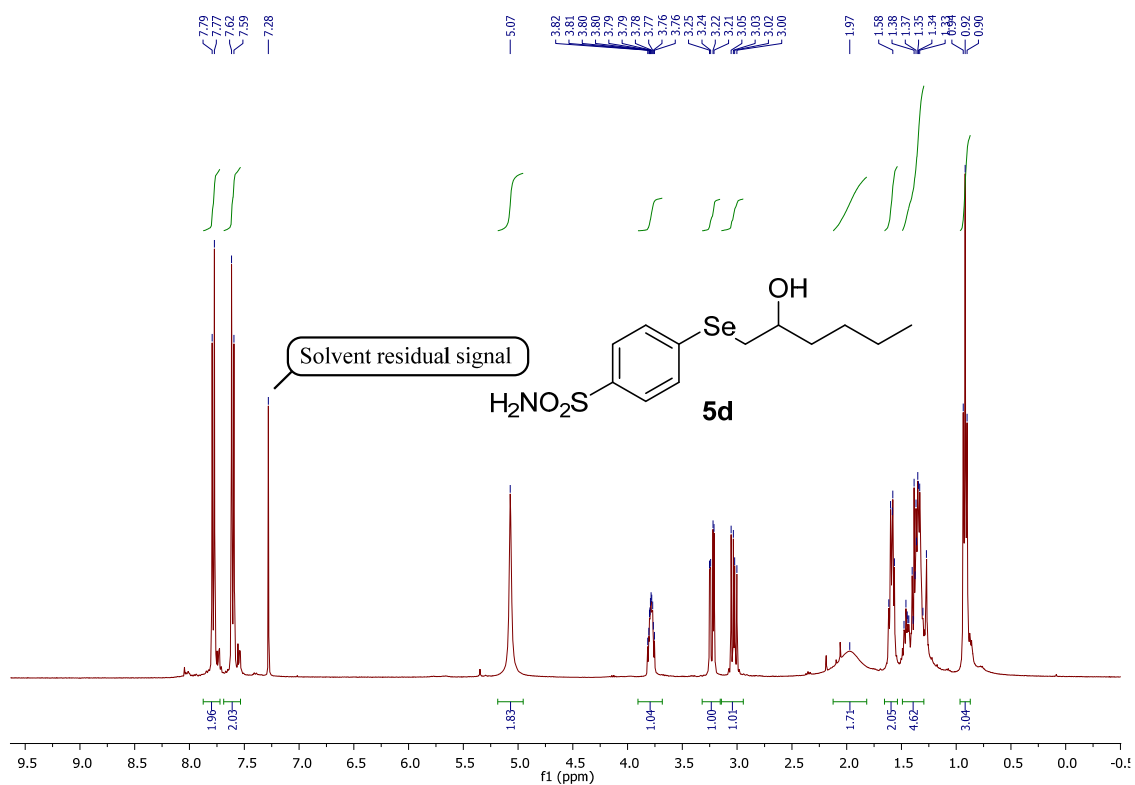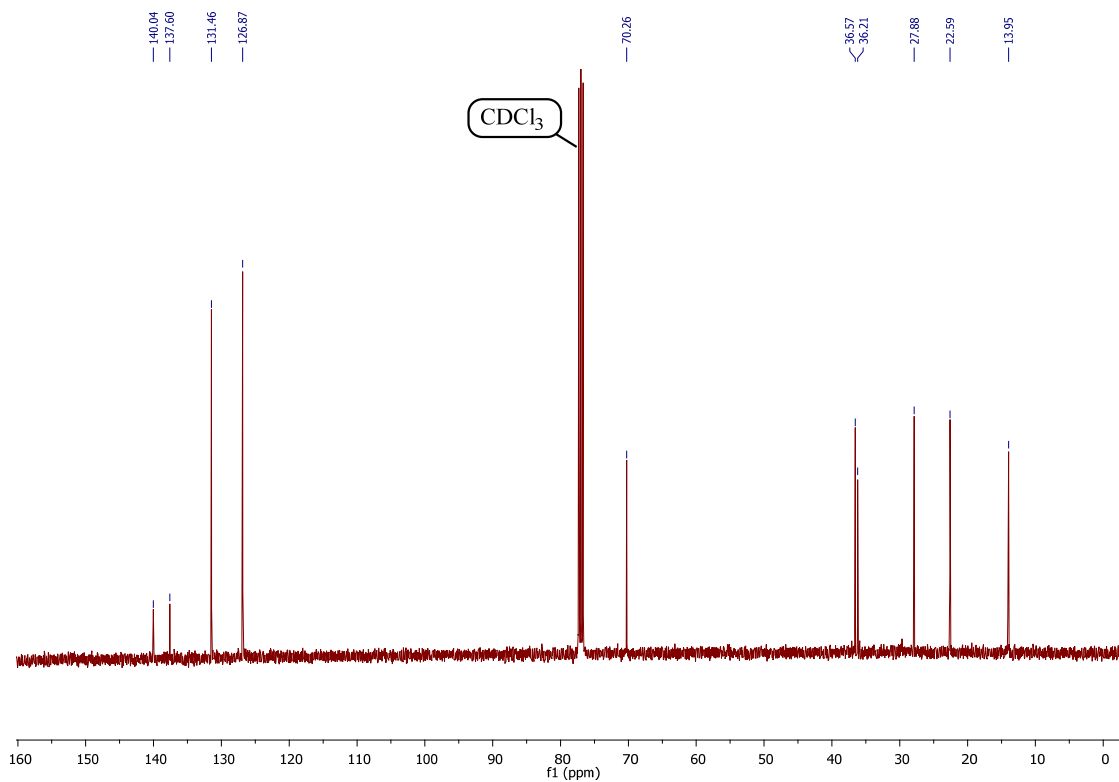



# $^1\text{H}$ and $^{13}\text{C}$ NMR Spectra of compound **5e**

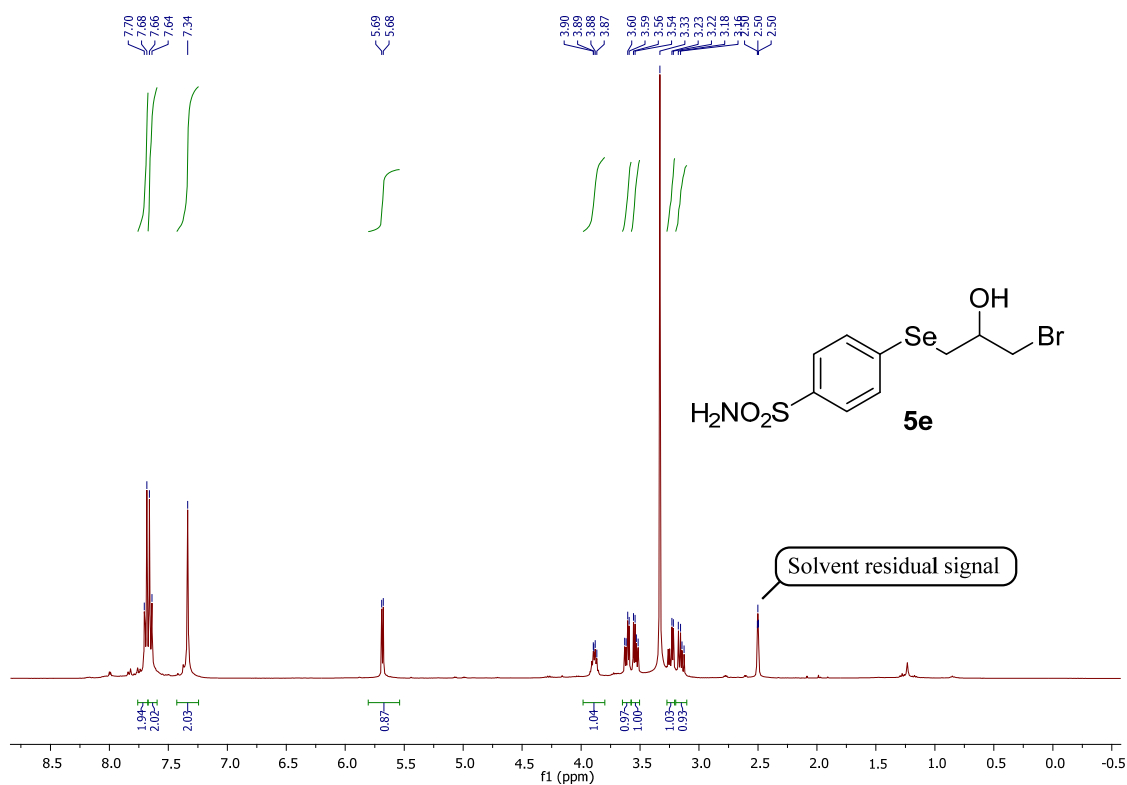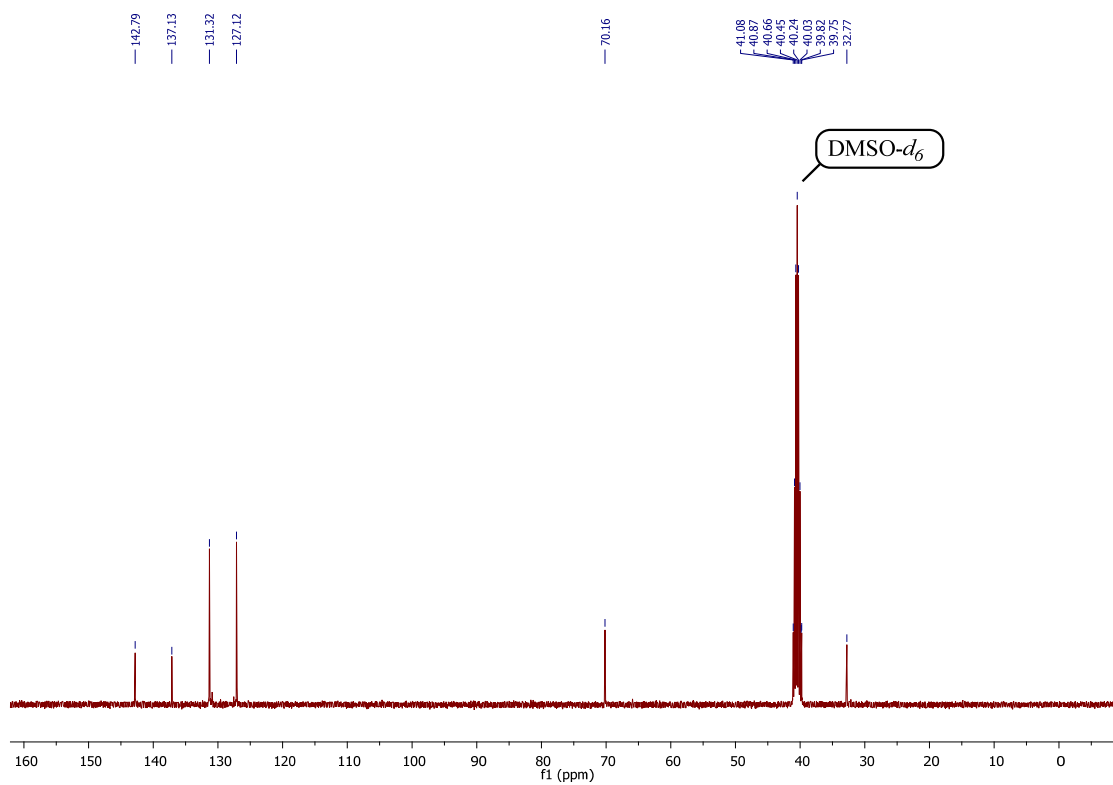

# $^1\text{H}$ and $^{13}\text{C}$ NMR Spectra of compound **5g**

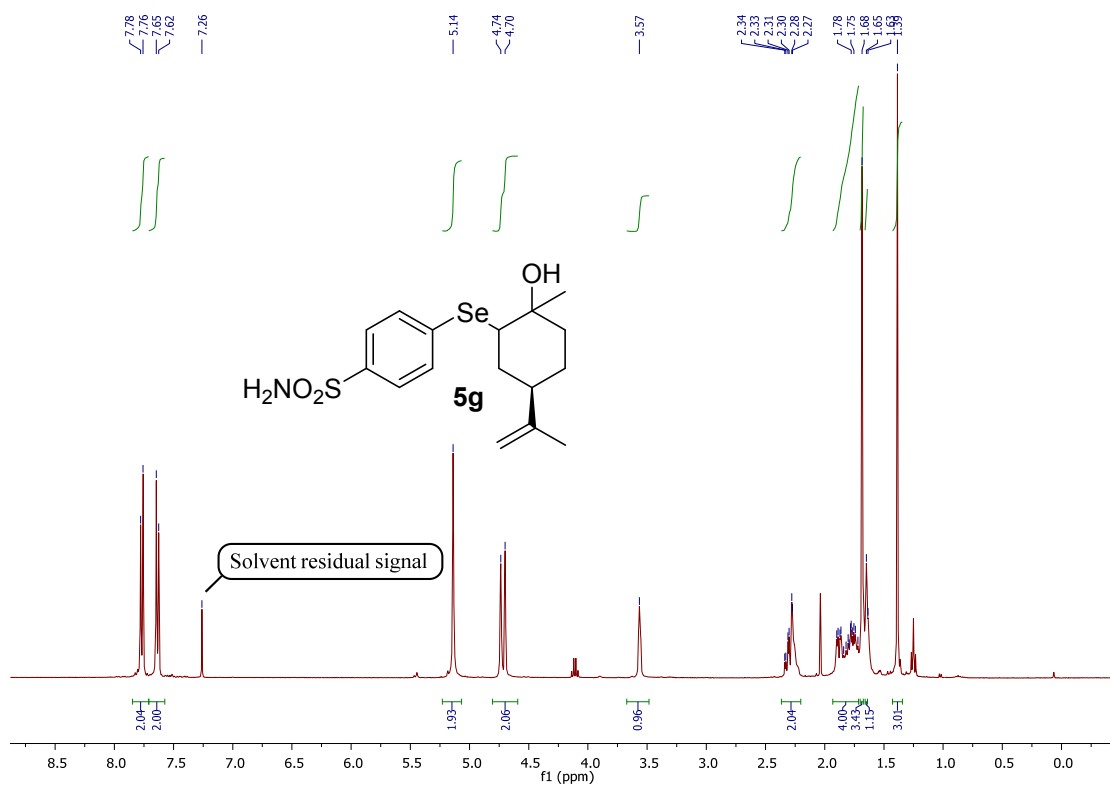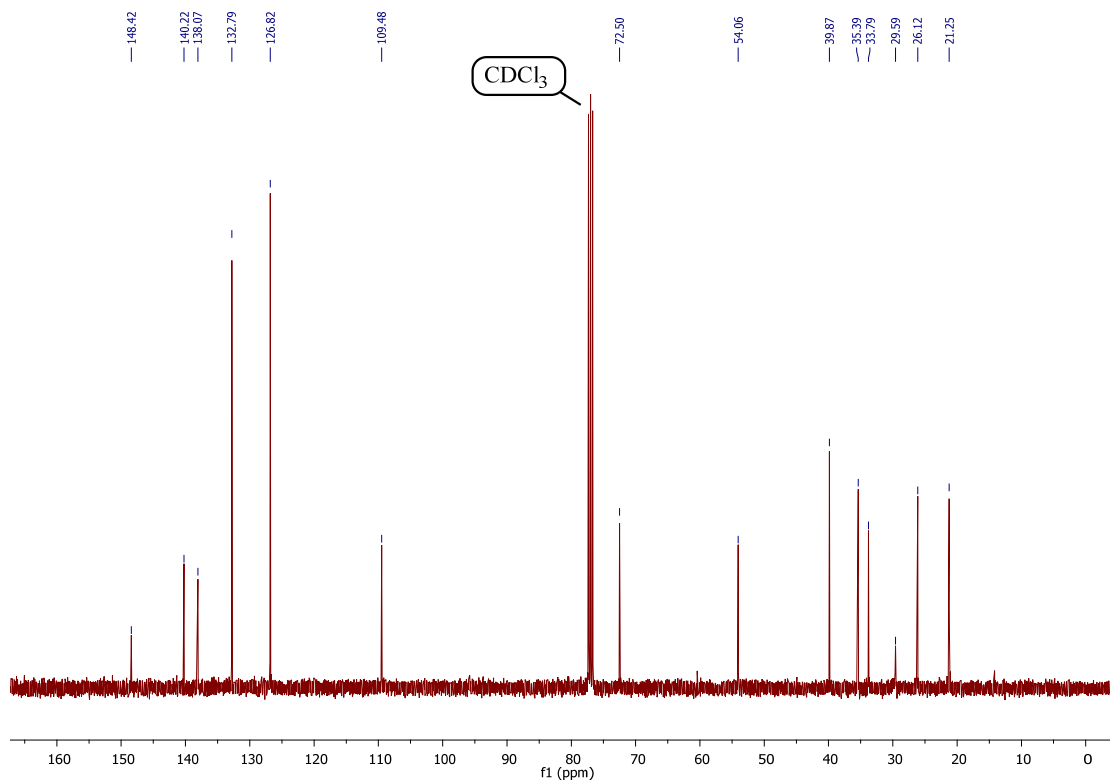

# $^1\text{H}$ and $^{13}\text{C}$ NMR Spectra of compound **7a**

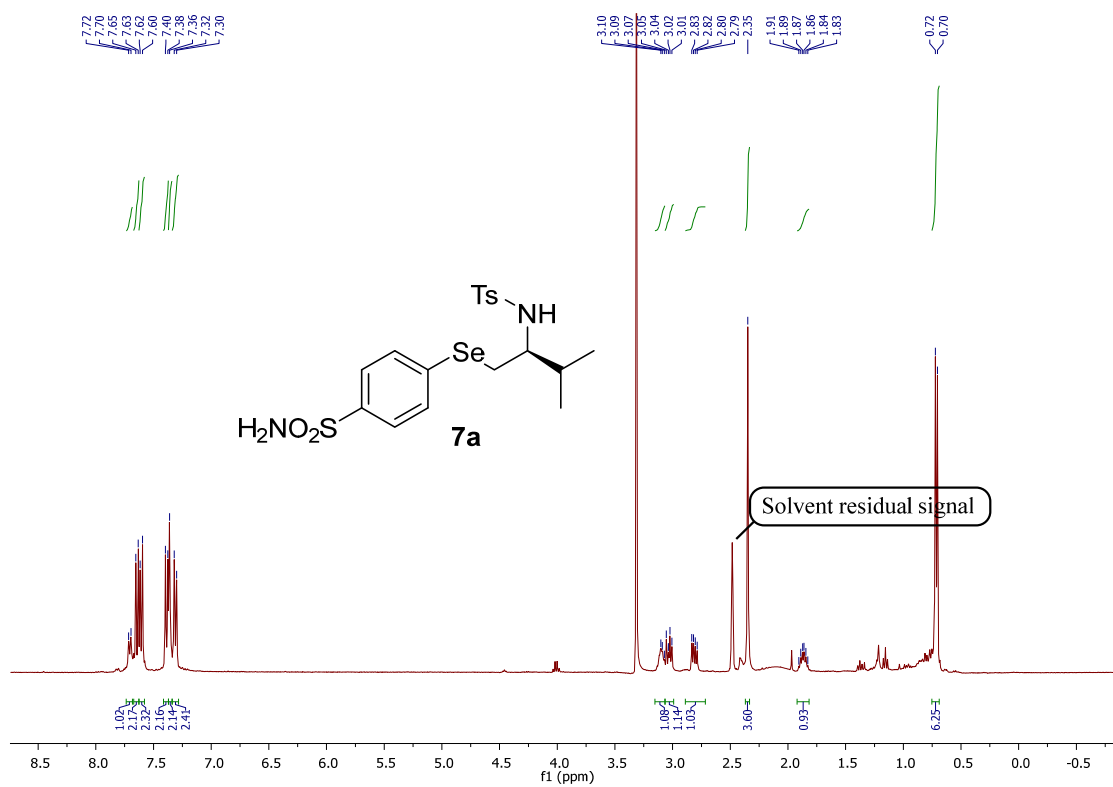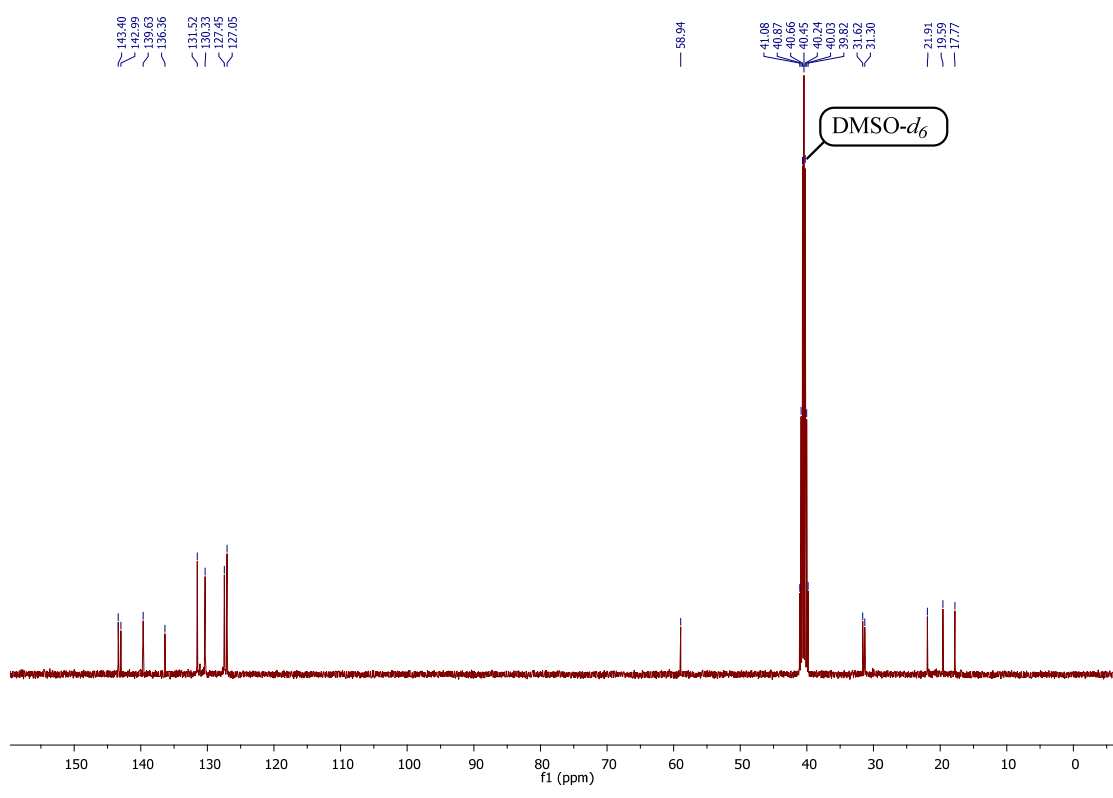

### $^{77}\text{Se}$ NMR Spectra of compound **7a**

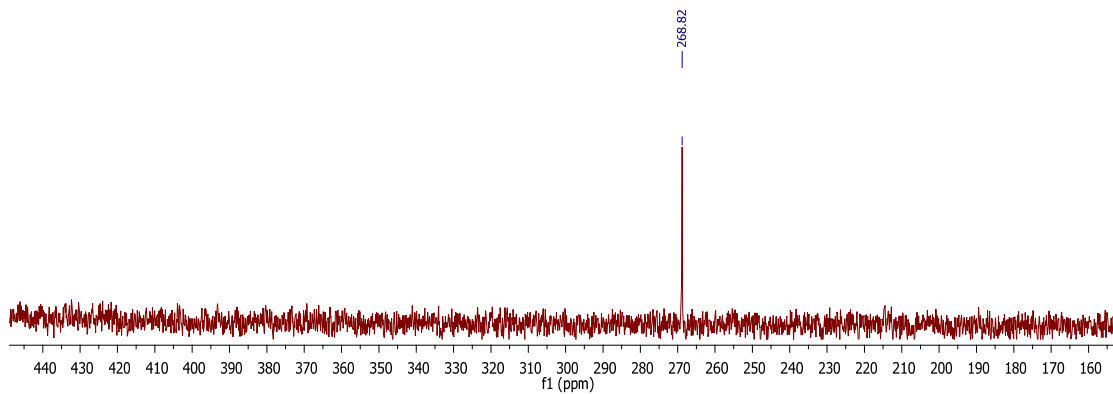

### $^1\text{H}$ and $^{13}\text{C}$ NMR Spectra of compound **7b**

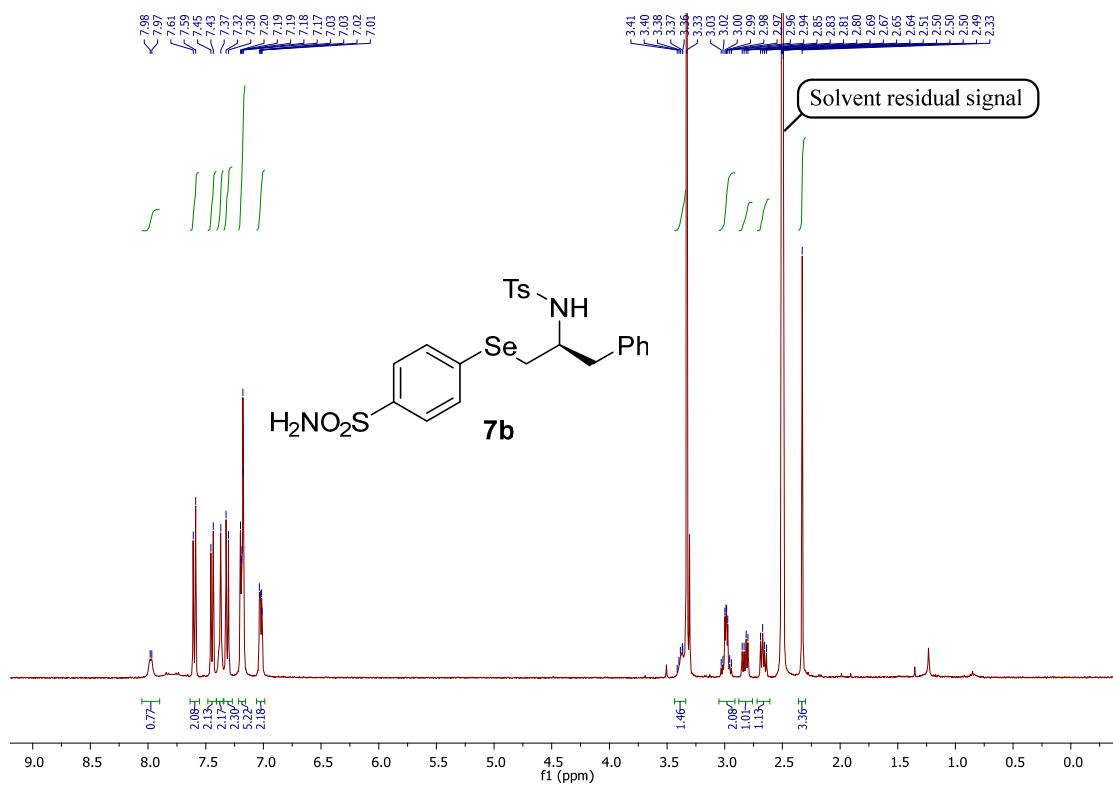

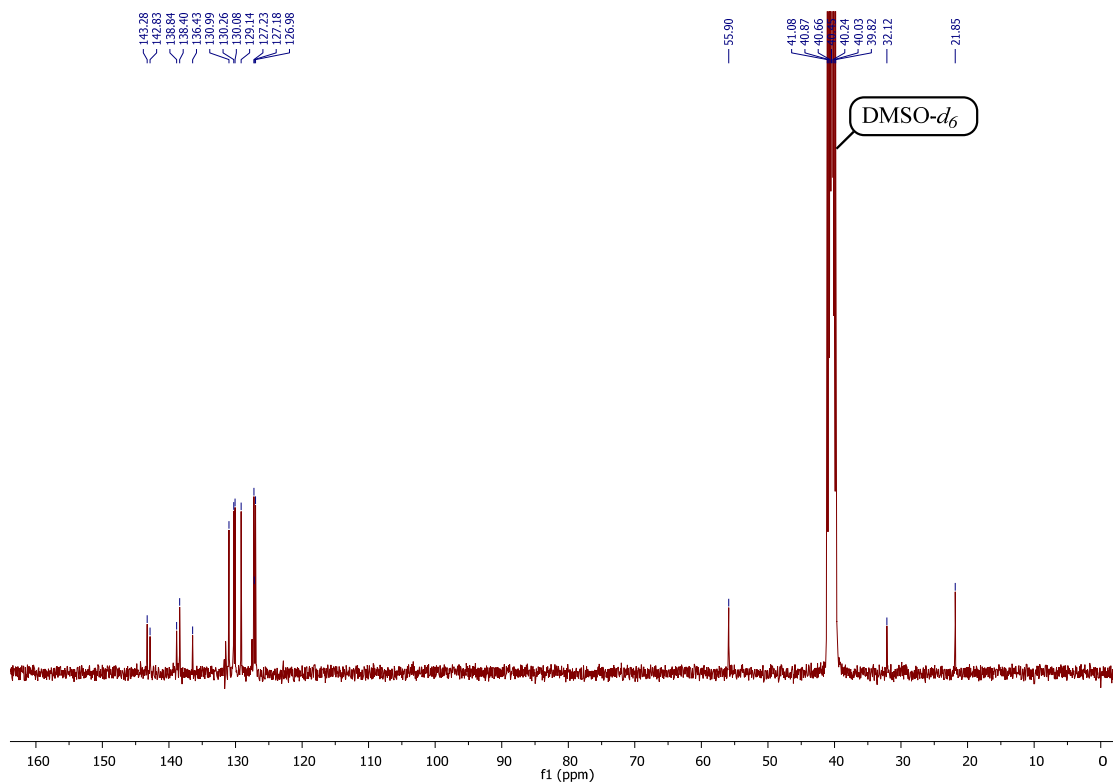

$^1\text{H}$  and  $^{13}\text{C}$  NMR Spectra of compound **7c**

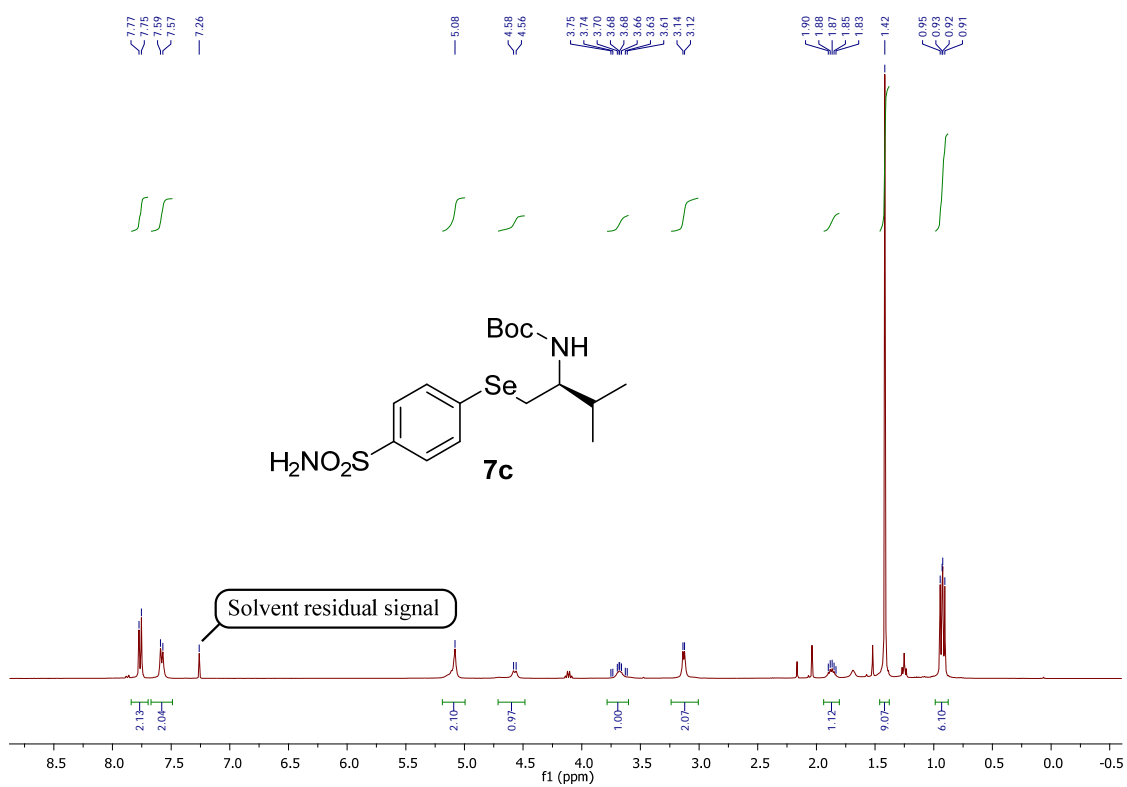

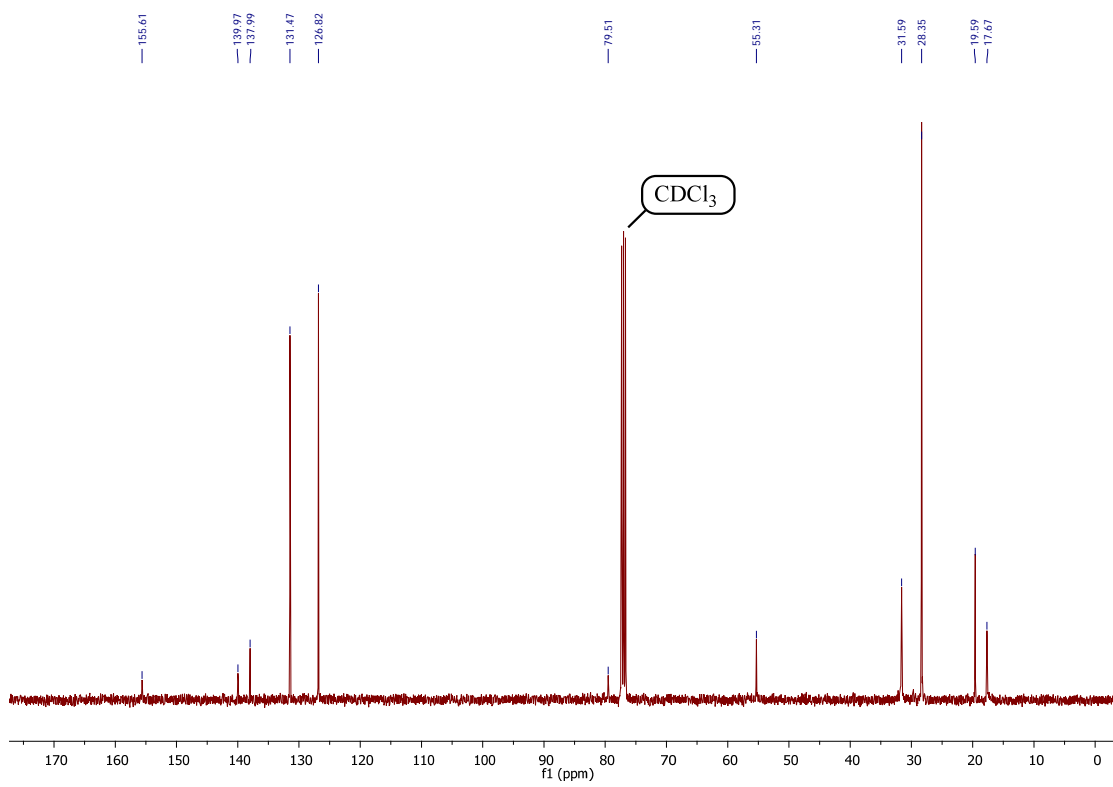

<sup>77</sup>Se NMR Spectra of compound 7c

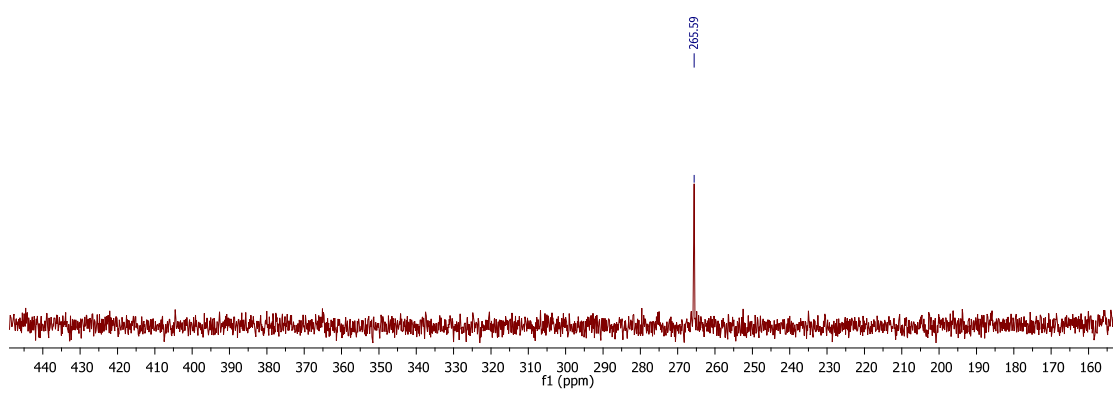

## 10. Human Carbonic Anhydrase activity

### Compound 2:

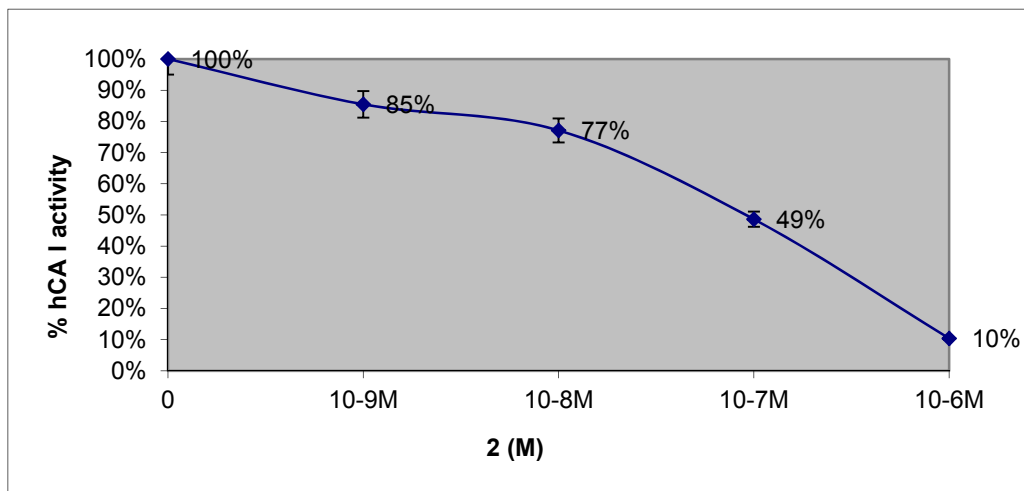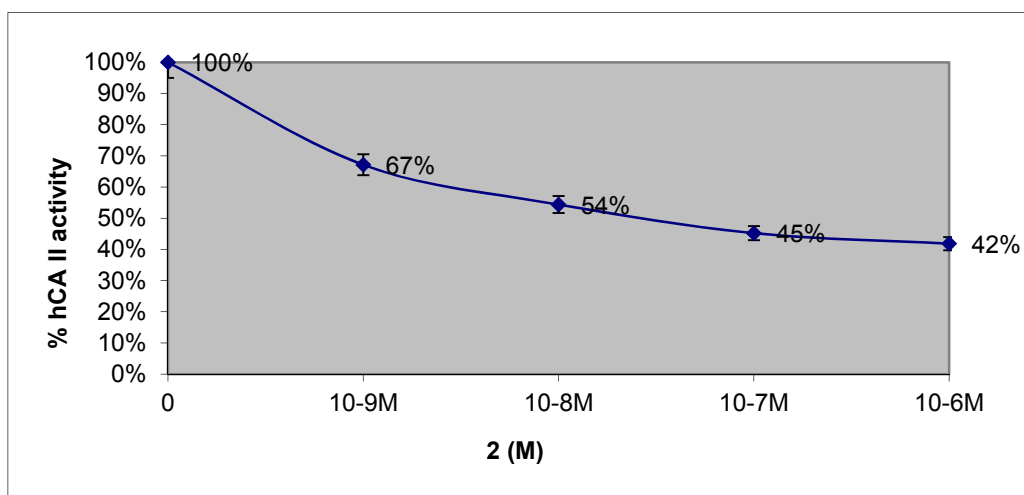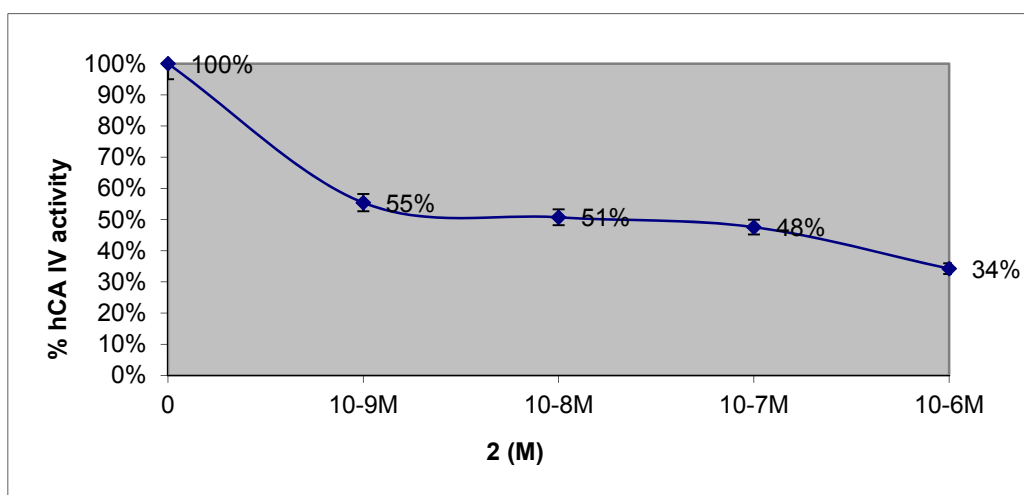

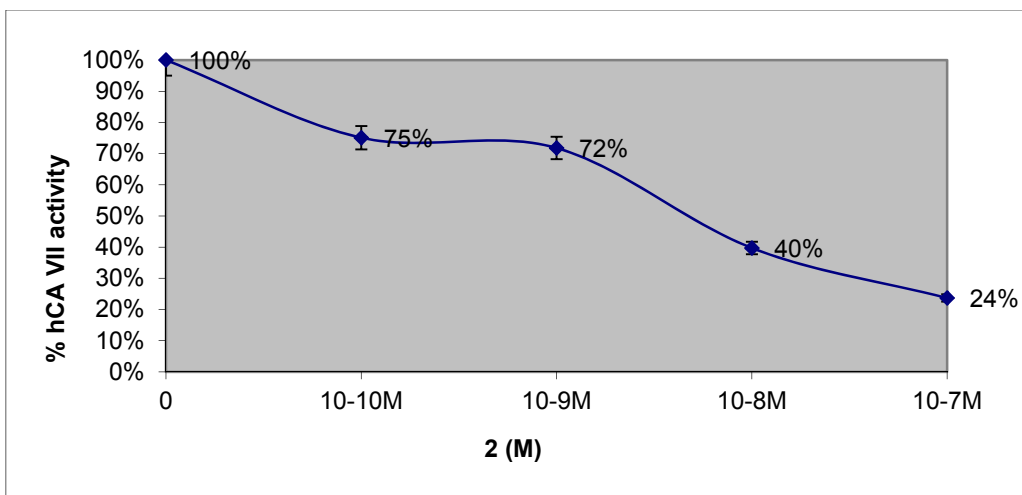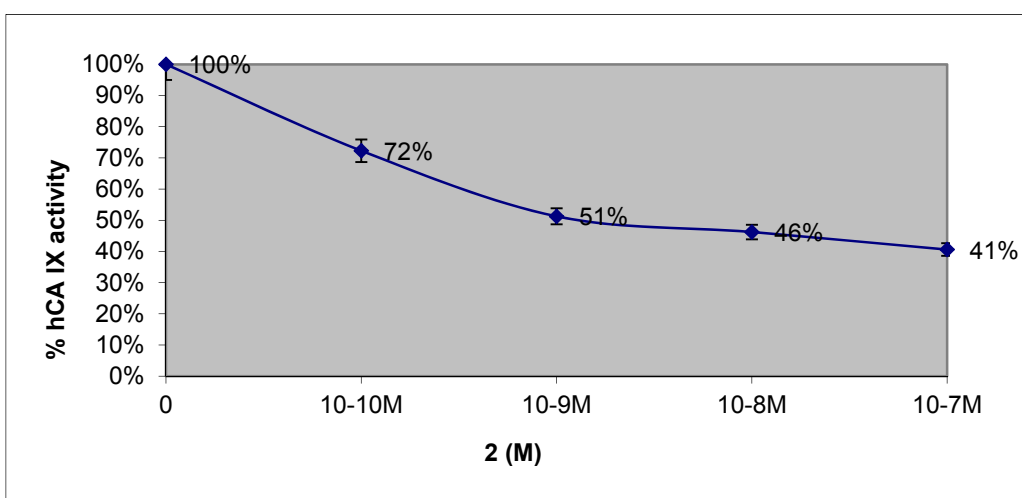

**Compound 3:**

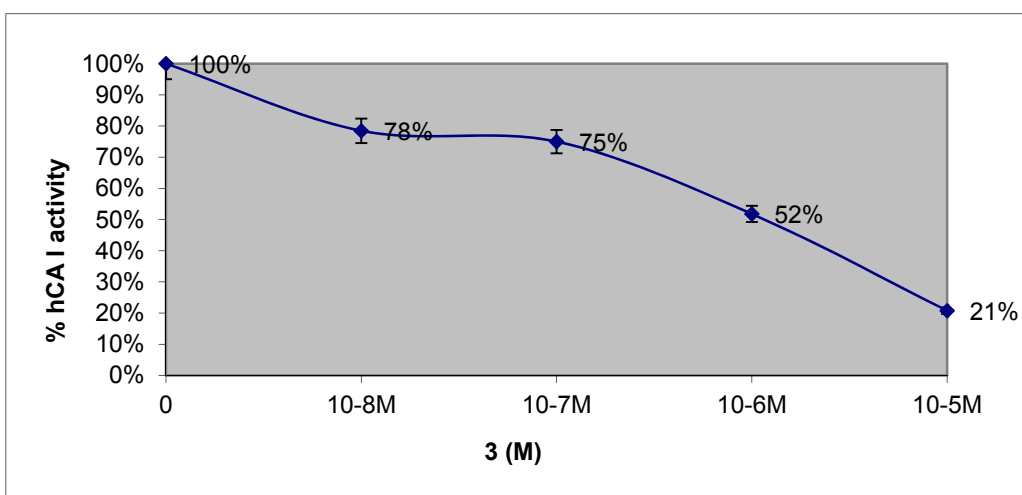



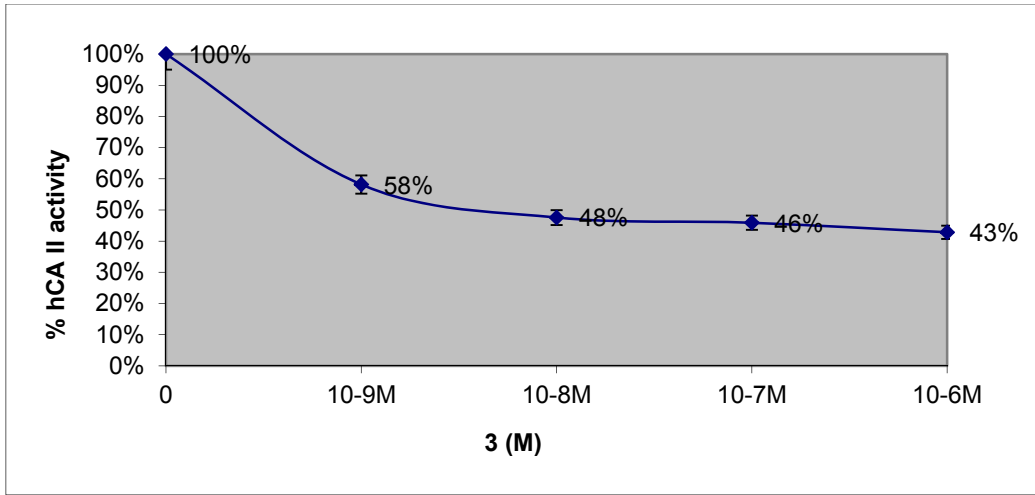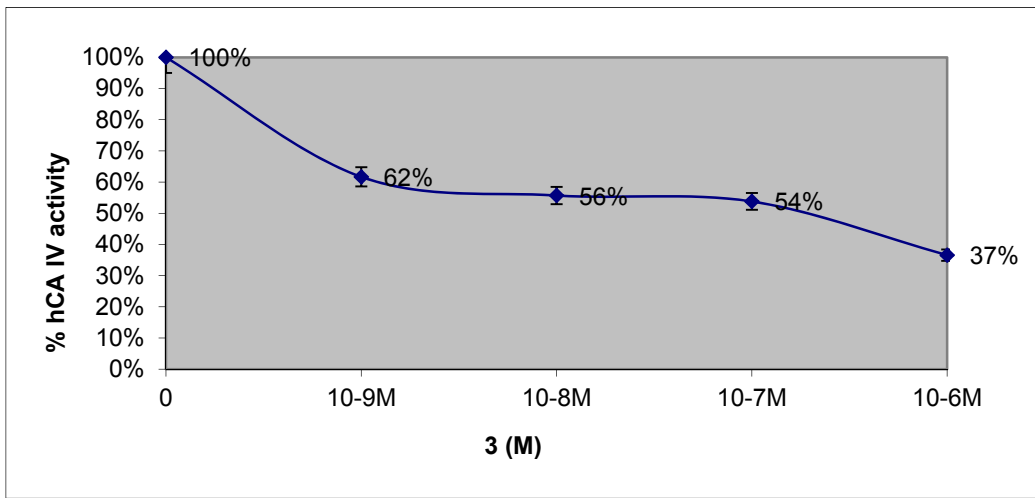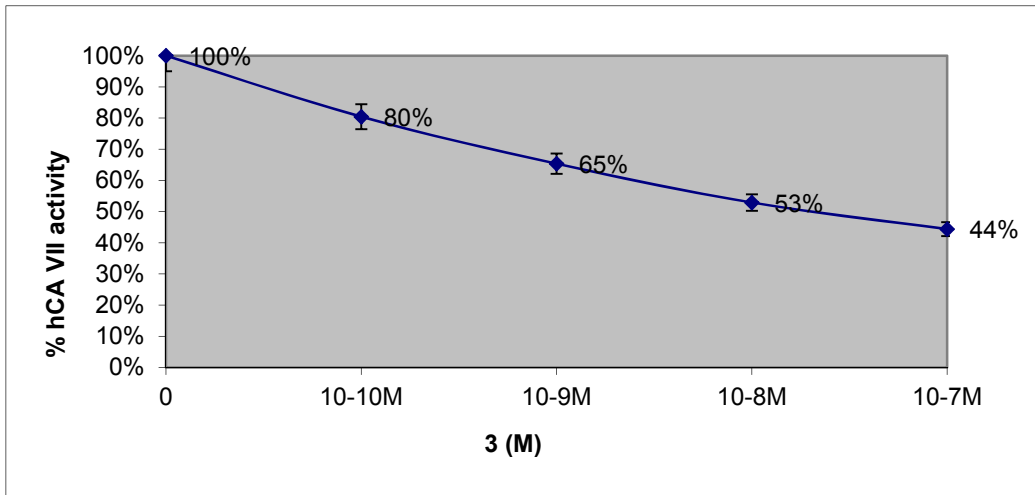

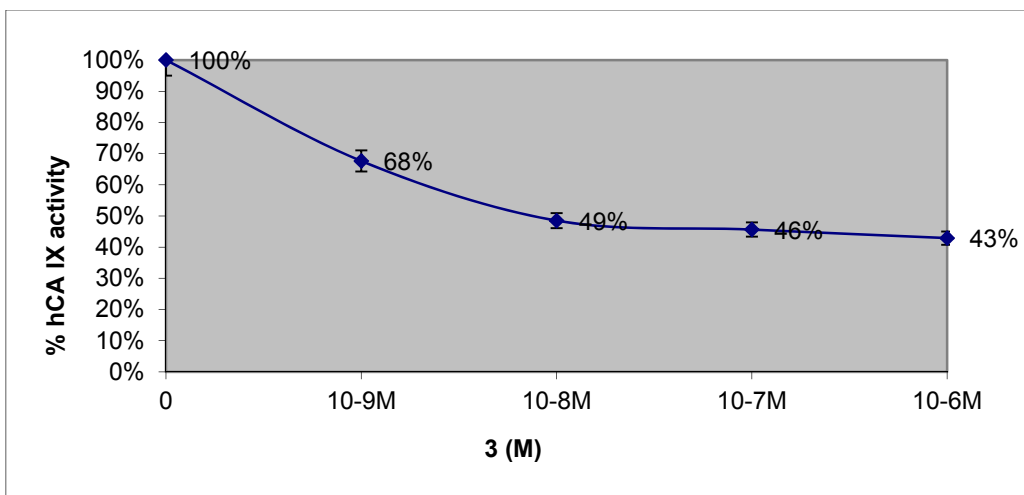

**Compound 5b:**

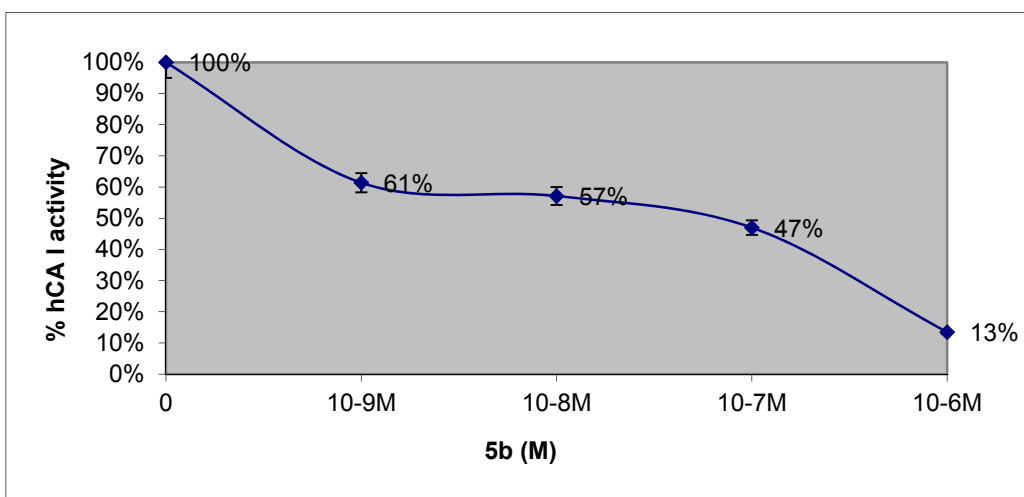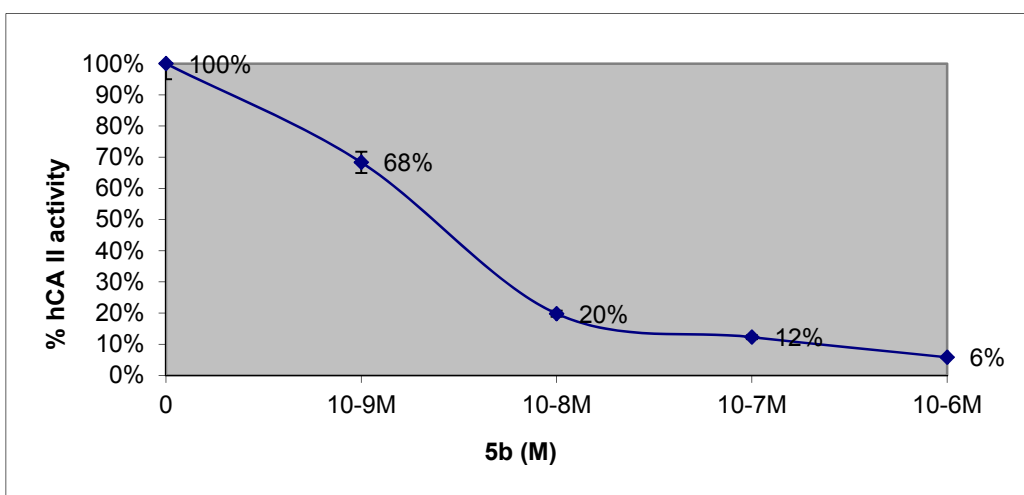

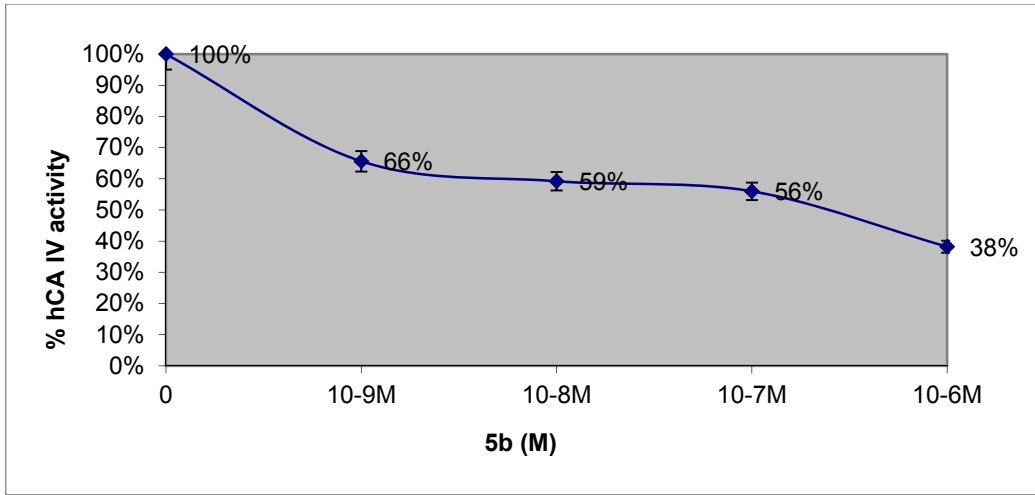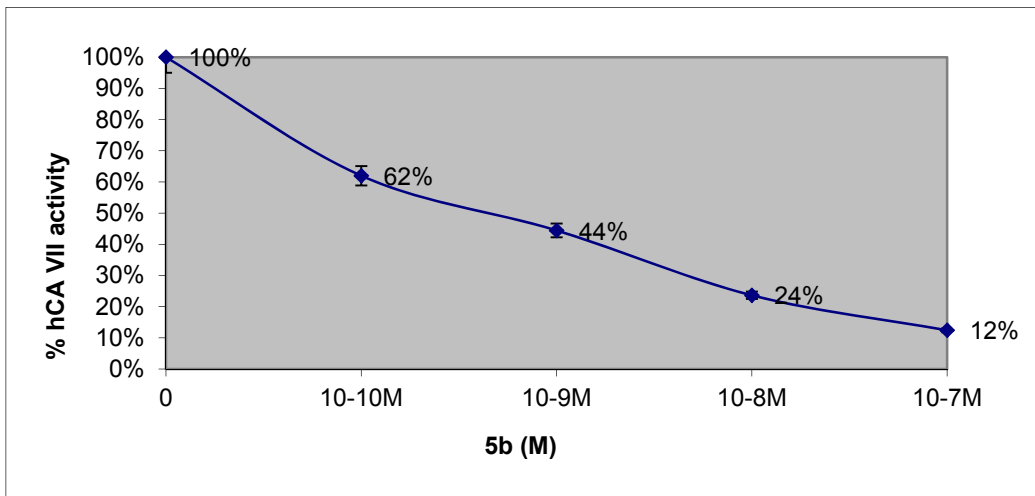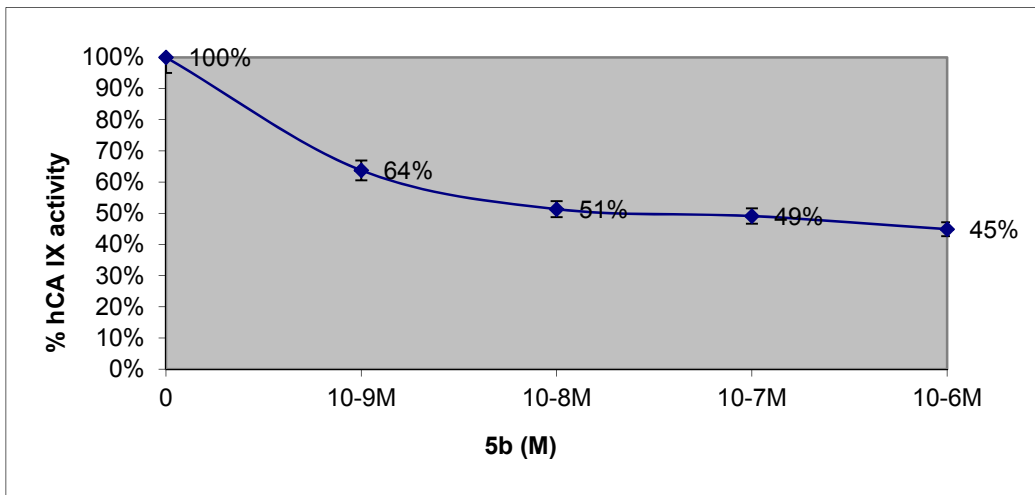

**Compound 5d:**

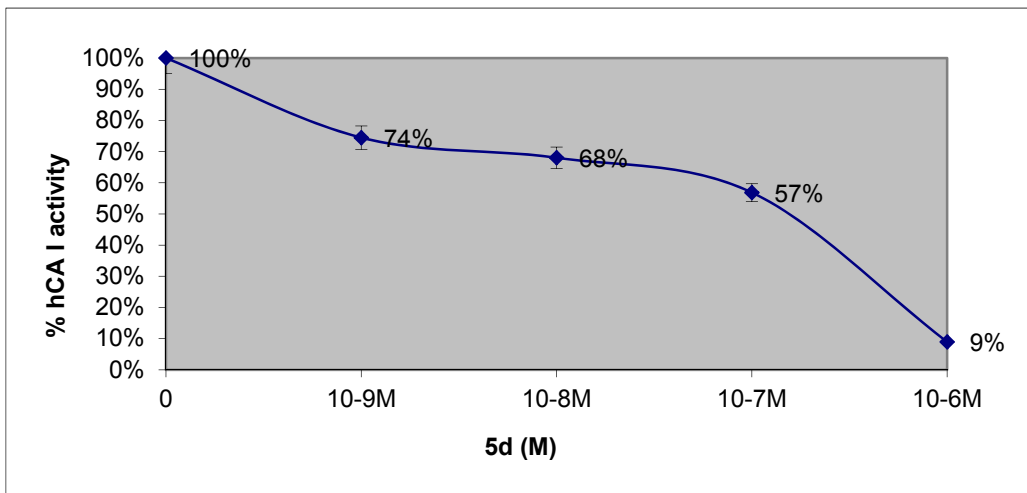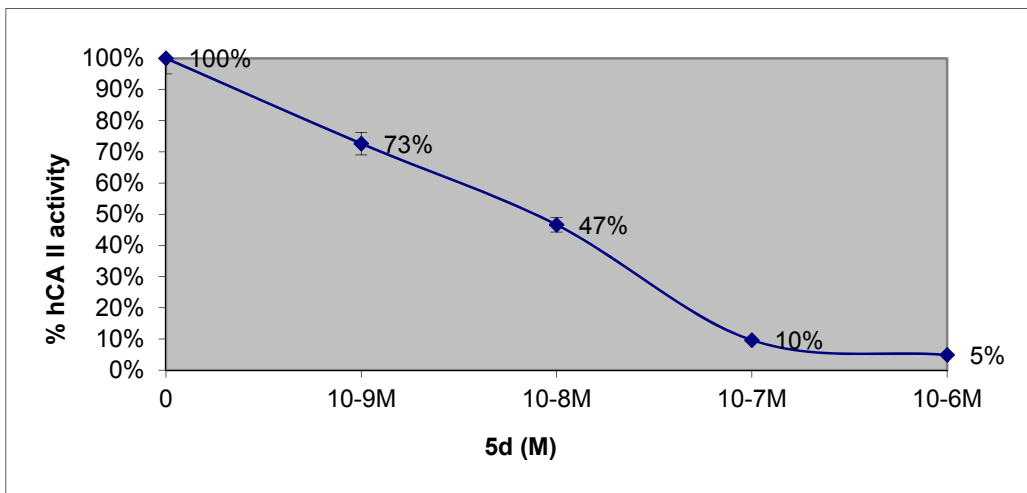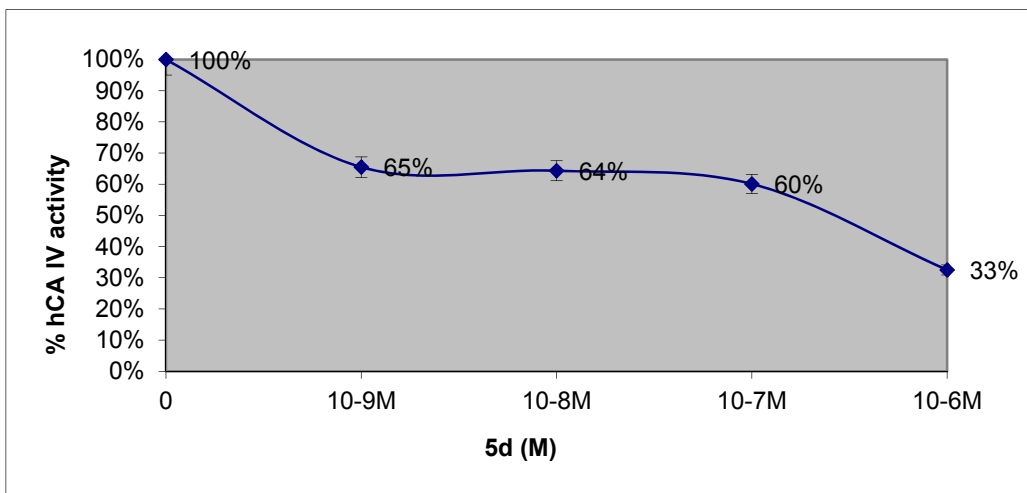

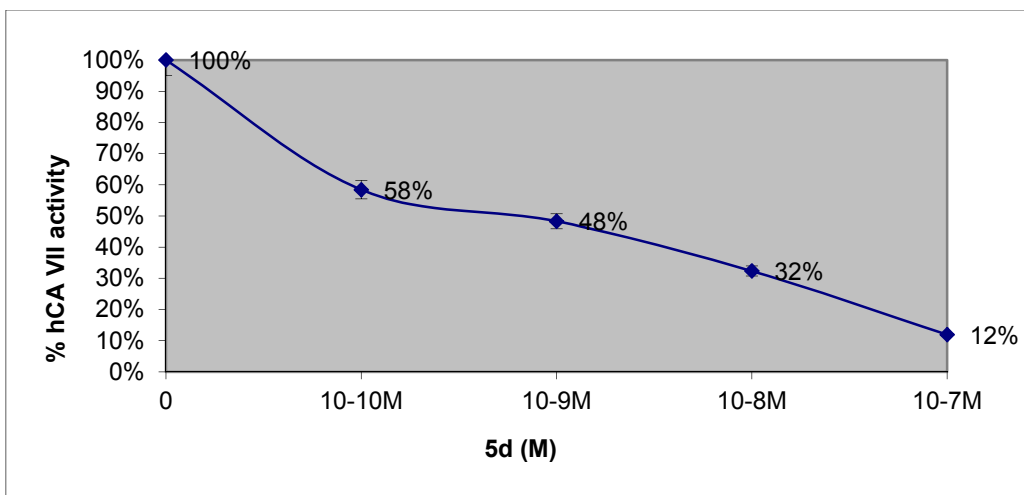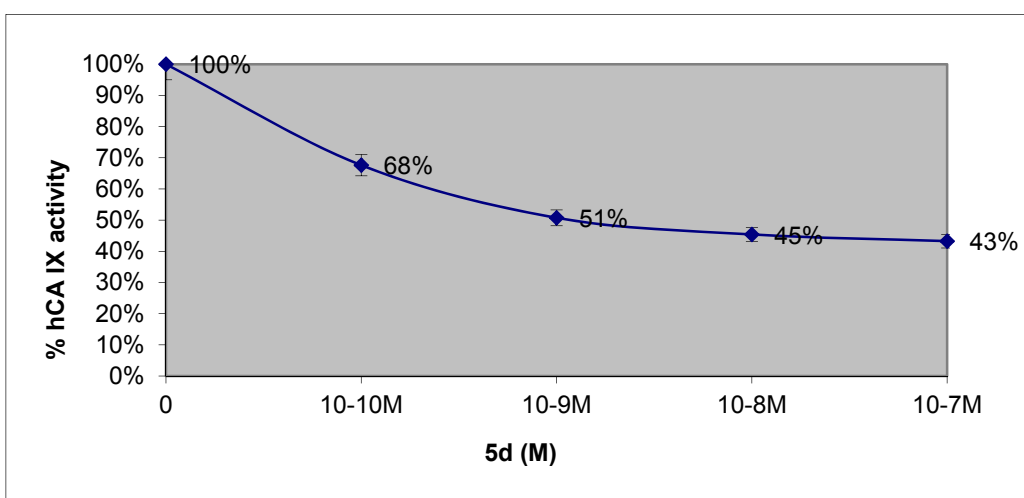

**Compound 7a:**

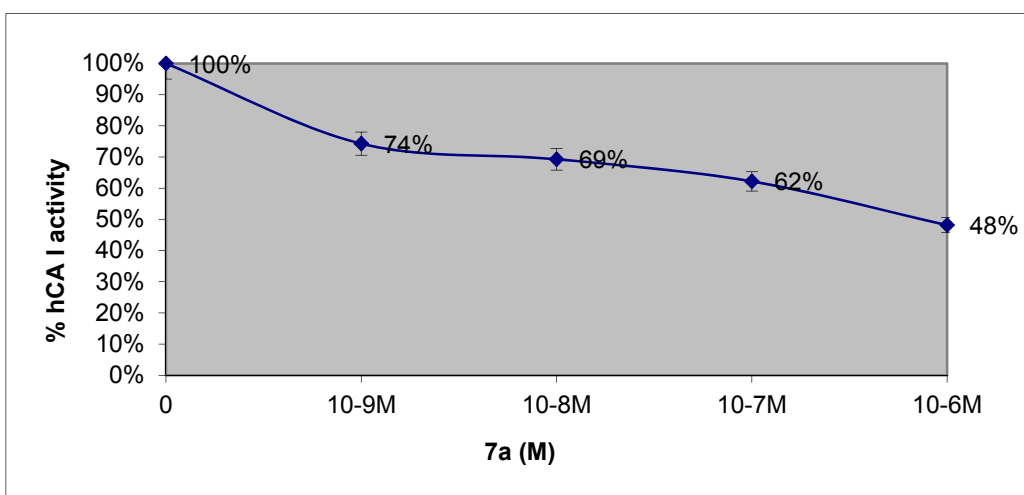

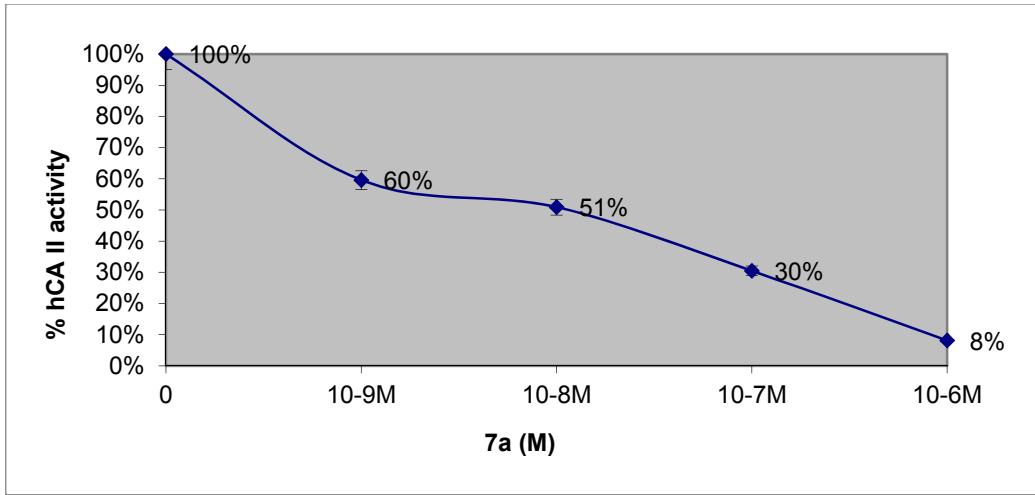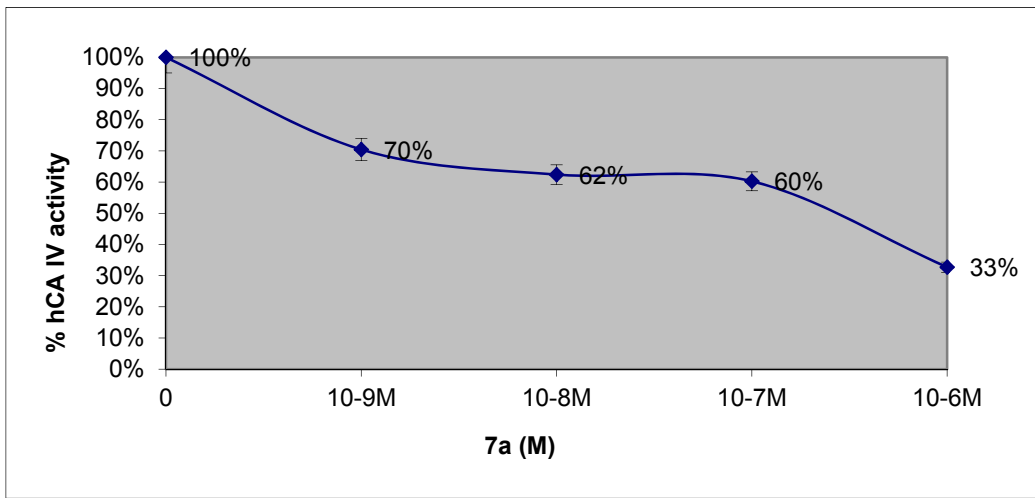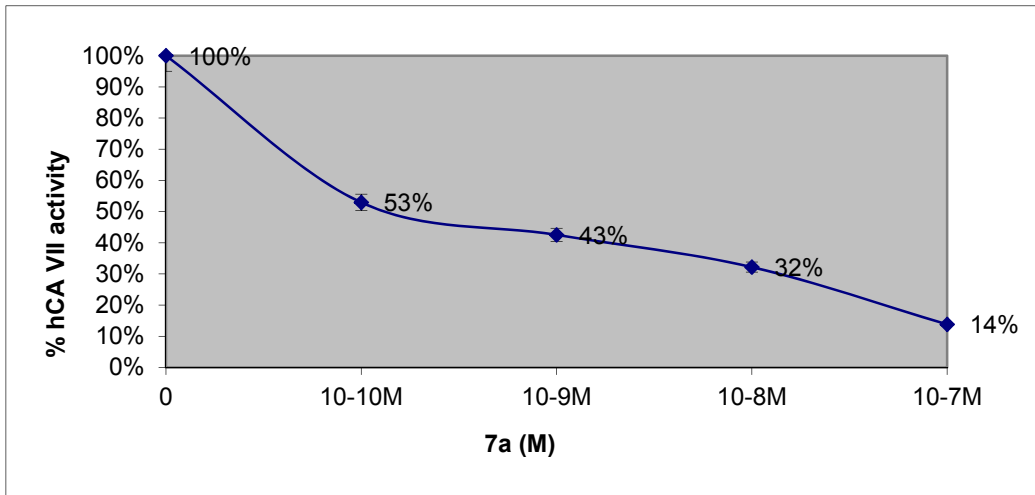

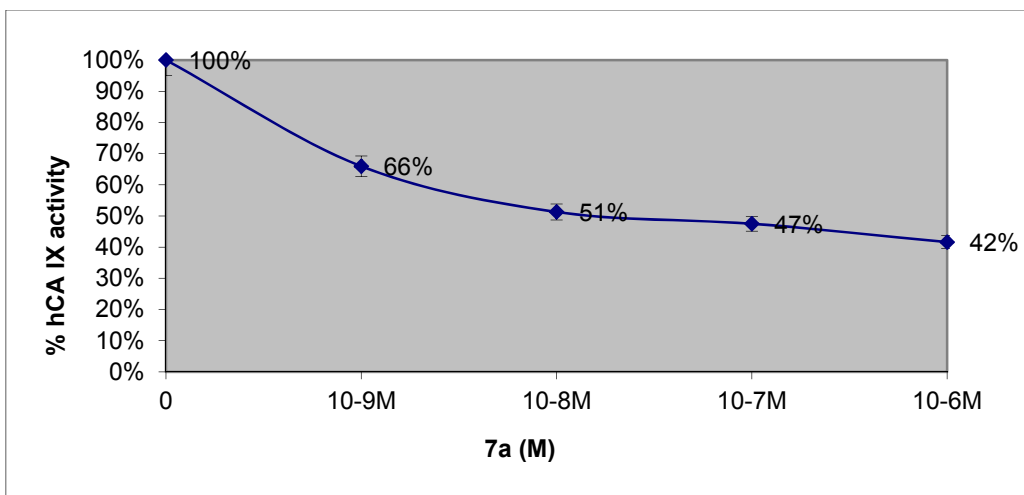

**Compound 7b:**

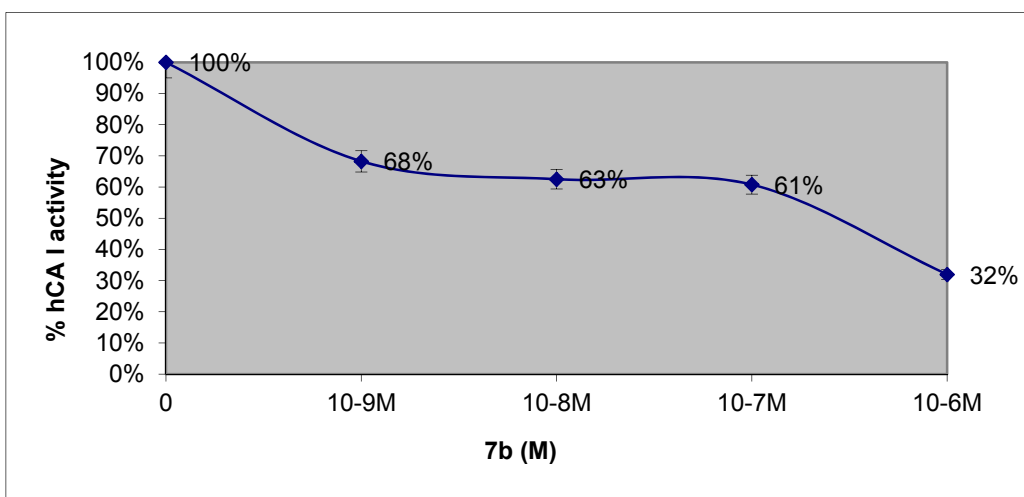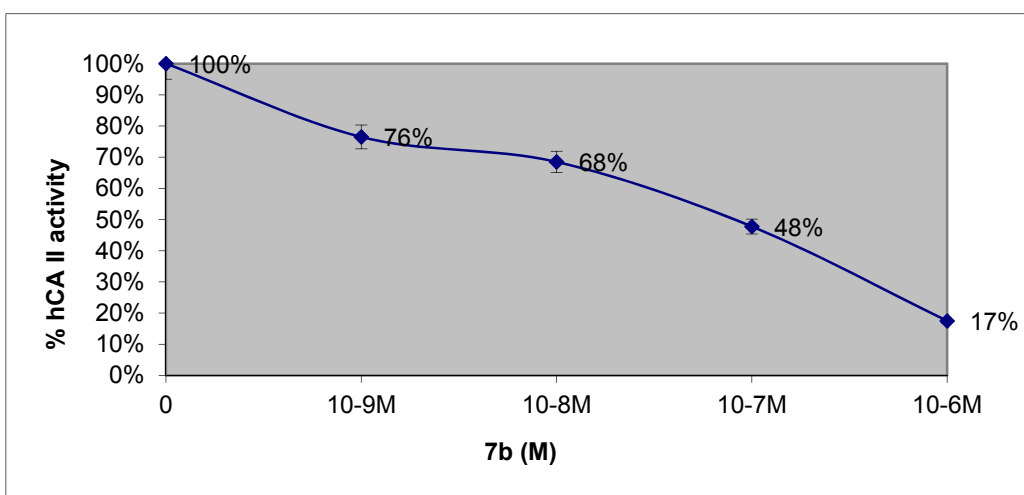

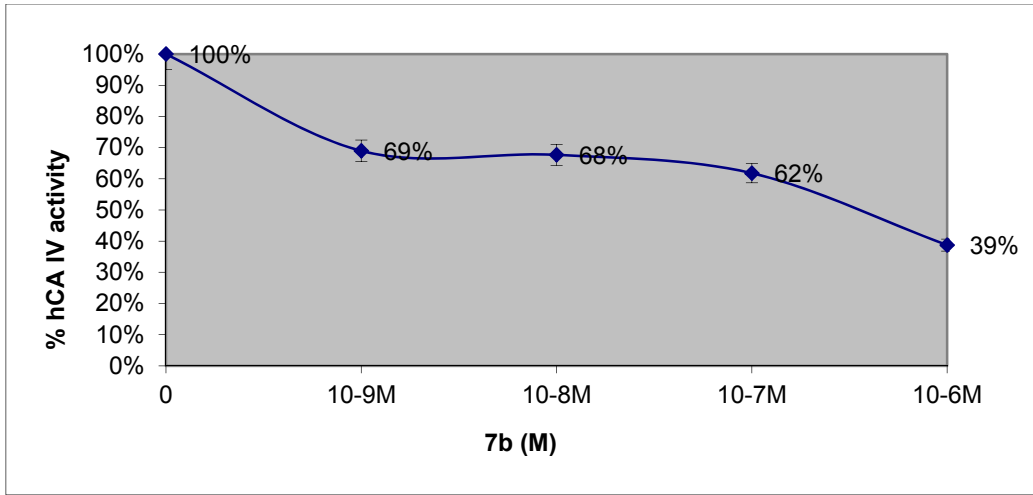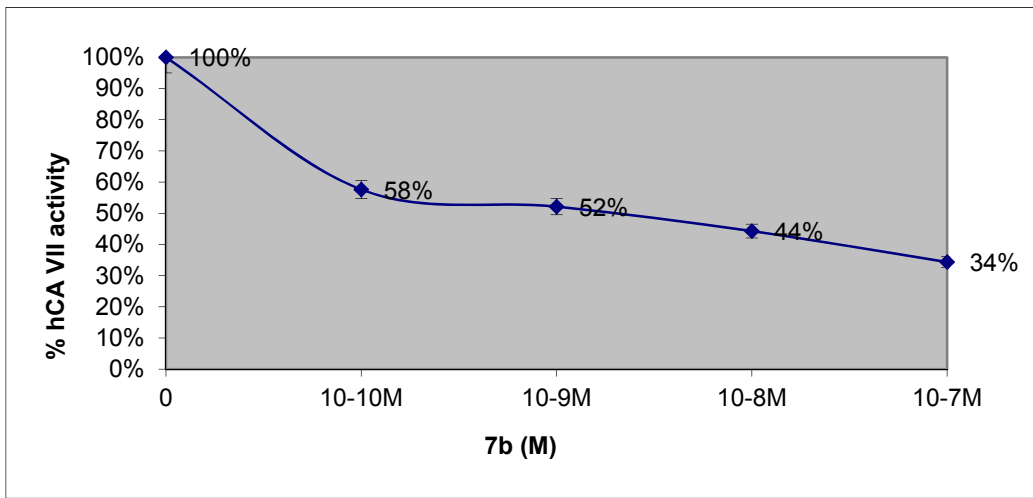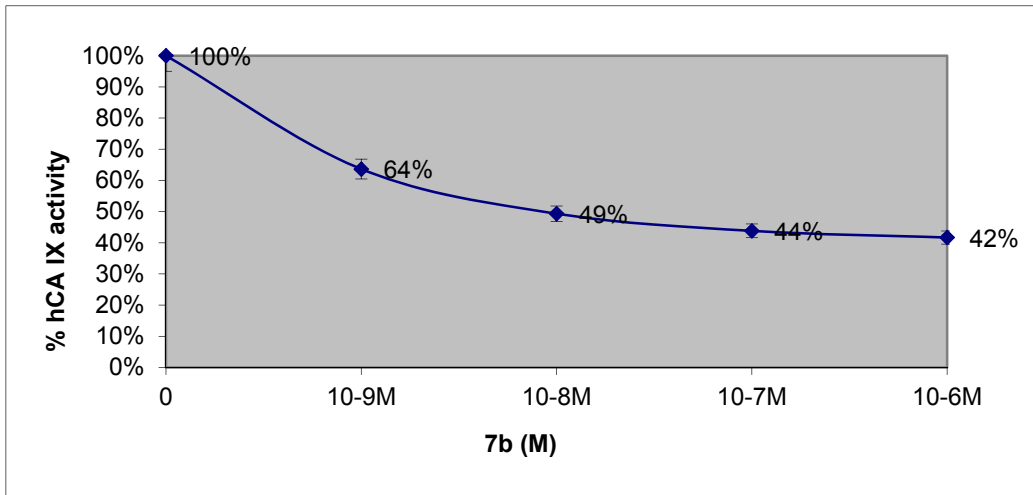



**Compound 7c:**

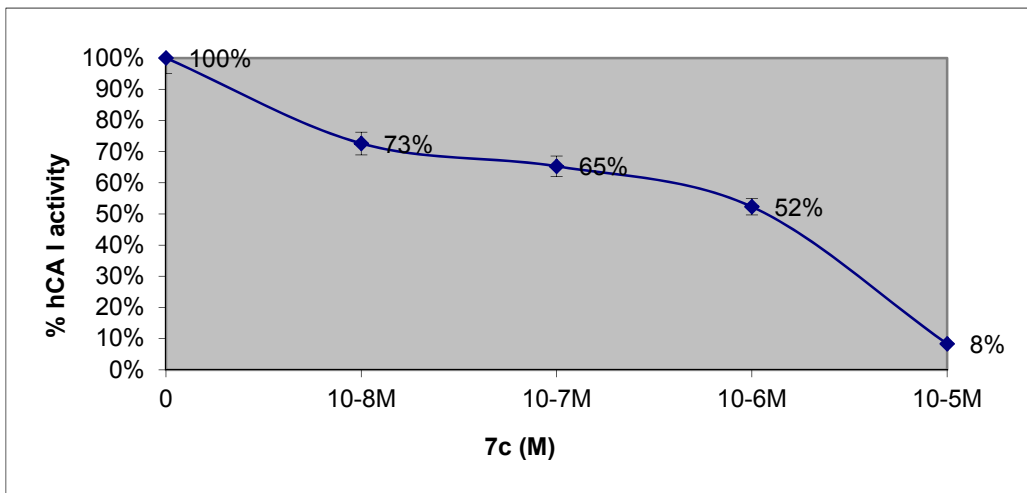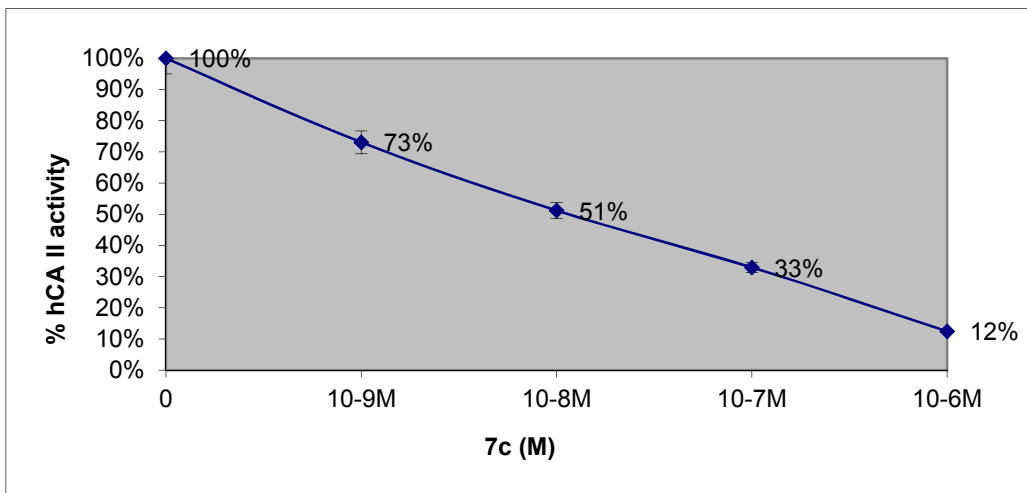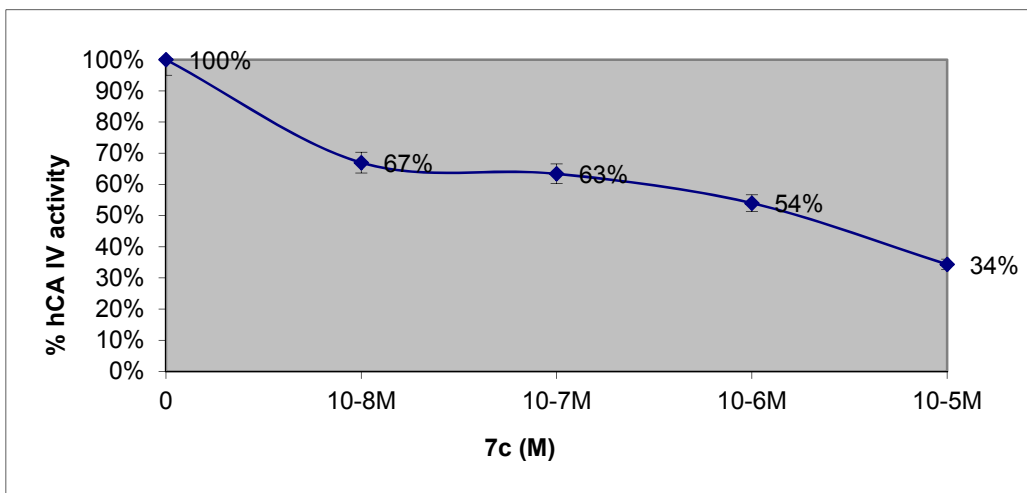

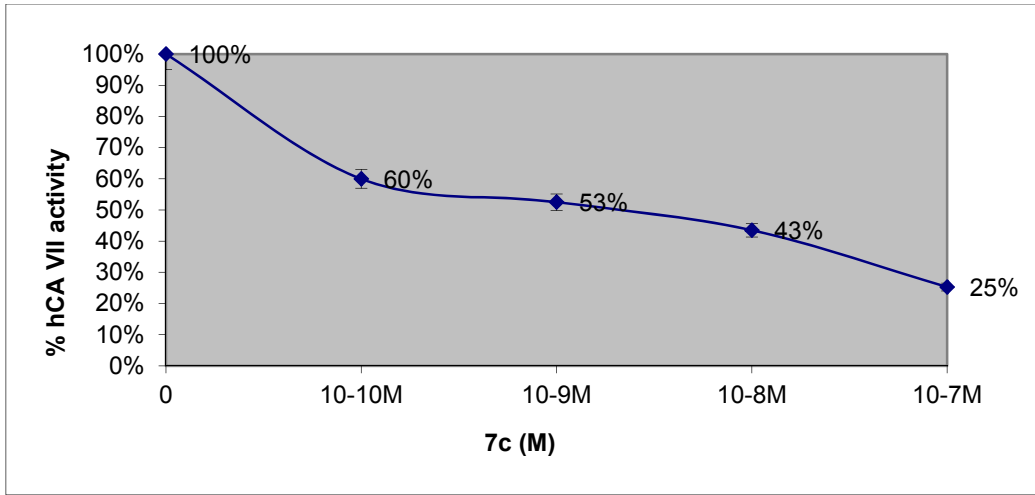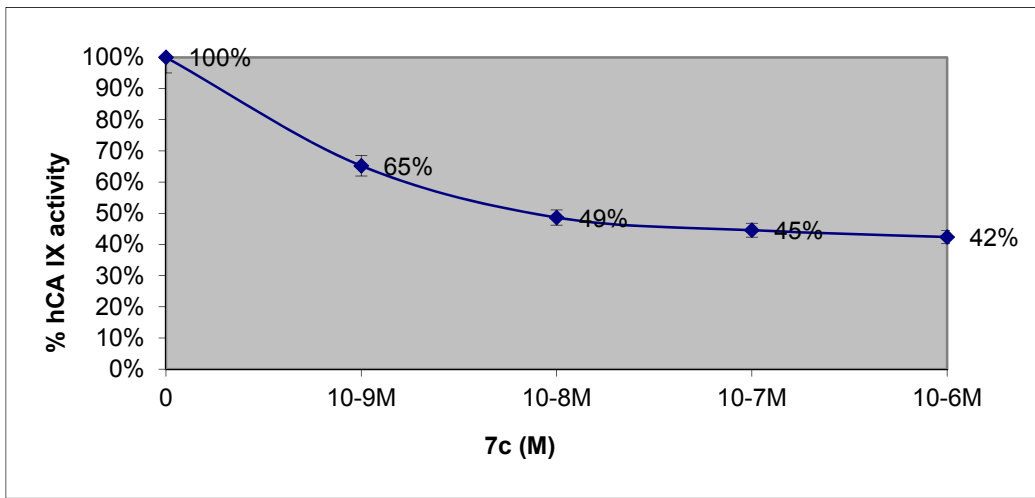

**Compound 8:**

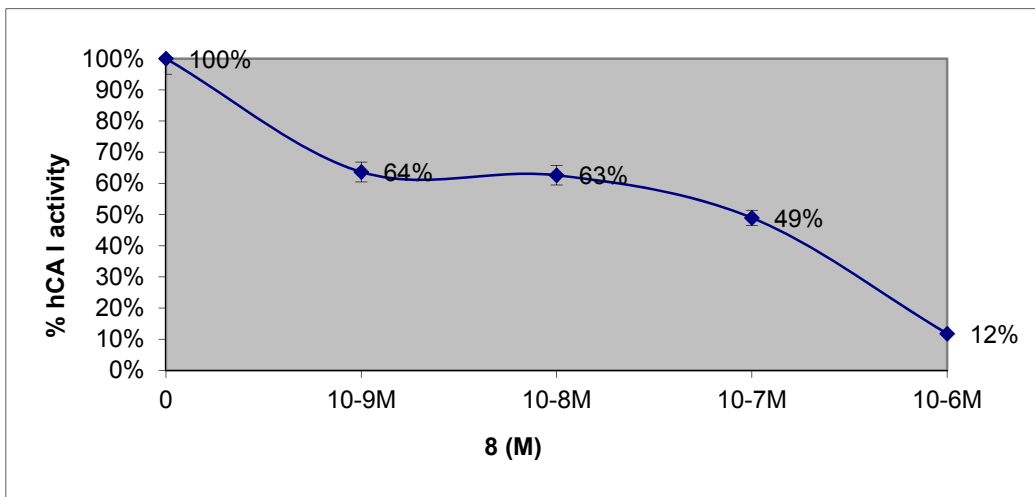

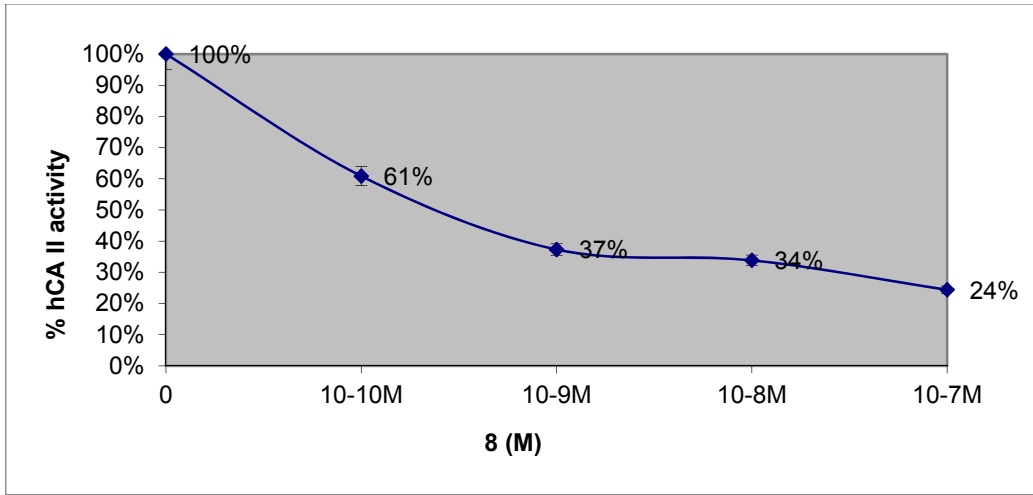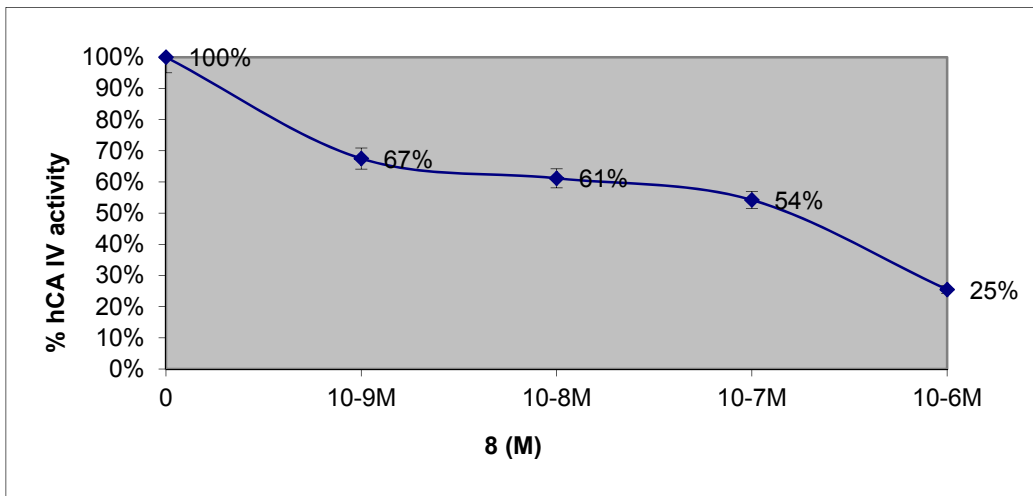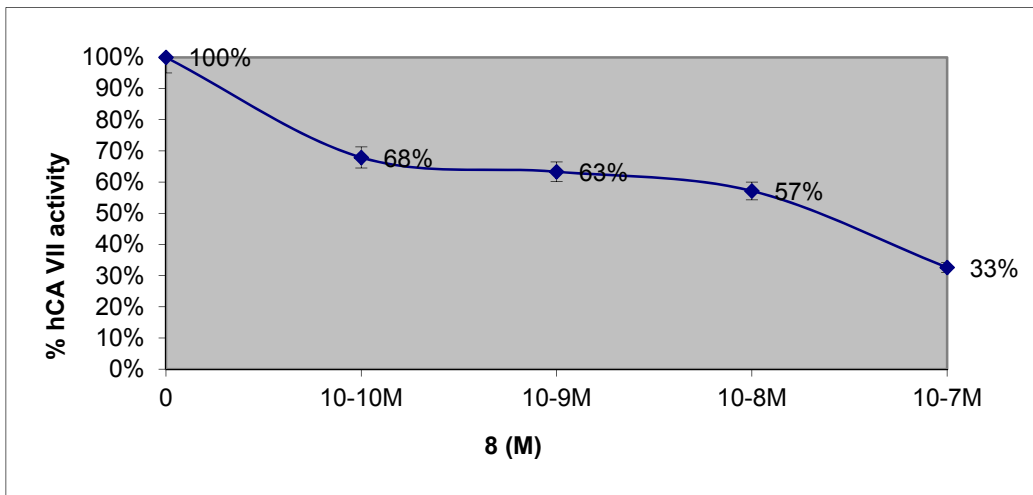

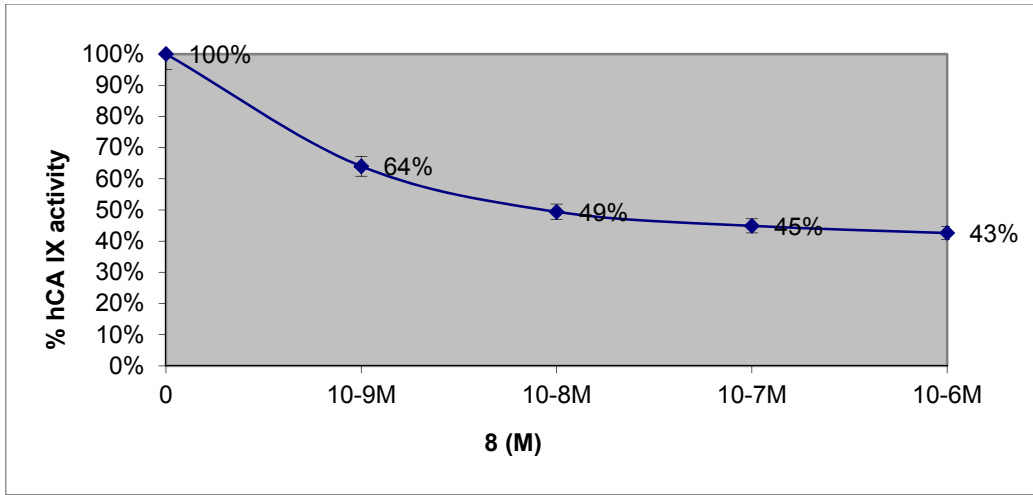

## 11. References

1. C. Charrat, A. Biscotti, G. Godeau, J. Greiner, P. Vierling, J. M. Guignonis, C. Di Giorgio, Formulation of highly functionalizable DNA nanoparticles based on 1,2-dithiolane derivatives, *ChemBioChem*, **2015**; *16*, 792-804.
2. A. Mollica, M. Locatelli, G. Macedonio, S. Carradori, A.P. Sobolev, R.F. De Salvador, S.M. Monti, M. Buonanno, G. Zengin, A. Angeli, C.T. Supuran. Microwave-assisted extraction, HPLC analysis, and inhibitory effects on carbonic anhydrase I, II, VA, and VII isoforms of 14 blueberry Italian cultivars, *J. Enzyme Inhib. Med. Chem.*, **2016**; *31*, 1-6.
3. D. De Vita, A. Angeli, F. Pandolfi, M. Bortolami, R. Costi, R. Di Santo, E. Suffredini, M. Ceruso, S. Del Prete, C. Capasso, L. Scipione, C.T. Supuran, Inhibition of the  $\alpha$ -carbonic anhydrase from *Vibrio cholerae* with amides and sulfonamide incorporating imidazole moieties, *J. Enzyme Inhib. Med. Chem.*, **2017**; *32*, 798-804.
4. E. Bruno, M.R. Buemi, A. Di Fiore, L. De Luca, S. Ferro, A. Angeli, R. Cirilli, D. Sadutto, V. Alterio, S.M. Monti, C.T. Supuran, G. De Simone, R. Gitto, Probing Molecular Interactions between Human Carbonic Anhydrases (hCAs) and a Novel Class of Benzenesulfonamides, *J Med Chem.*, **2017**; *60*, 4316-4326.
5. M. Abdoli, A. Angeli, M. Bozdog, F. Carta, A. Kakanejadifard, H. Saeidian, C.T. Supuran, Synthesis and carbonic anhydrase I, II, VII, and IX inhibition studies with a series of benzo[d]thiazole-5- and 6-sulfonamides, *J Enzyme Inhib Med Chem.* **2017**; *32*, 1071-1078.
6. C.B. Mishra, S. Kumari, A. Angeli, S.M. Monti, M. Buonanno, M. Tiwari, C.T. Supuran, Discovery of Benzenesulfonamides with Potent Human Carbonic Anhydrase Inhibitory and Effective Anticonvulsant Action: Design, Synthesis, and Pharmacological Assessment, *J Med Chem.* **2017**; *60*, 2456-2469.
7. A.A. Abdel-Aziz, A. Angeli, A.S. El-Azab, M.A. Abu El-Enin, C.T. Supuran, Synthesis and biological evaluation of cyclic imides incorporating benzenesulfonamide moieties as carbonic anhydrase I, II, IV and IX inhibitors, *Bioorg Med Chem.* **2017**; *25*, 1666-1671.
